# Supplementary material for: Male and Female Animals Respond Differently to High-Fat Diet and Regular Exercise Training in a Mouse Model of Hyperlipidemia
Source: Int J Mol Sci. 2021 Apr 18;22(8):4198. doi: 10.3390/ijms22084198 (PMC8073713; doi:10.3390/ijms22084198)
Supplement: Supplementary file 1 [file ijms-22-04198-s001.zip › ijms-1176662-supplementary/Supplementary_Tables.xlsx]

## Sheet: S1_P values_Sed_ATs
Table S1.
	ApoB100/HFD vs. WT/ND						Female vs. Male
	BAT		WAT SC		WAT VIS		BAT		WAT SC		WAT VIS
	male	female	male	female	male	female	WT	ApoB	WT	ApoB	WT	ApoB
Lep	0.0019	0.0363	0.0041	0.0426	0.0023	0.0085	0.6948	0.2535	0.0694	0.0287	0.3269	0.7884
Adipoq	0.8218	0.9383	0.9575	0.5447	0.2756	0.8578	0.4004	0.3578	0.0751	0.0933	0.6585	0.0834
Retn	0.9169	0.2988	0.1227	0.9583	0.0592	0.0394	0.0175	0.4884	0.4542	0.6757	0.0055	0.1312
Fgf21	0.0146	0.0016	0.8643	0.0677	0.8695	0.0497	0.6102	0.5518	0.0213	0.3203	0.1816	0.5002
Nampt	0.2106	0.1314	0.3741	0.1844	0.8419	0.0265	0.1762	0.0049	0.8765	0.0695	0.0111	0.7347
Rarres2	0.0159	0.4178	0.5928	0.1488	0.0102	0.0239	0.9611	0.0839	0.0238	0.4962	0.1705	0.3777
Tnf	0.0305	0.063	0.1128	0.3182	0.0346	0.1724	0.1579	0.0976	0.0957	0.4194	0.1268	0.0217
Il1b	0.1923	0.2503	0.3679	0.2315	0.1399	0.2329	0.9425	0.8561	0.0653	0.1273	0.0055	0.6789
Tgfb1	0.2851	0.1952	0.0006	0.5906	0.0439	0.1082	0.5966	0.8917	0.0726	0.1962	0.0224	0.1464
Il10	0.1182	0.2361	0.5766	0.2763	0.1562	0.2263	0.5969	0.7889	0.1776	0.8454	0.9736	0.4837
Lepr	0.3739	0.1172	0.9348	0.29	0.7753	0.2947	0.0247	0.9966	0.1079	0.5122	0.0055	0.436
Cd36	0.1766	0.5688	0.5819	0.2768	0.359	0.2207	0.0126	0.0361	0.0902	0.2807	0.8115	0.6099
Insr	0.7577	0.4562	0.6526	0.3933	0.0597	0.6176	0.1821	0.0715	0.1065	0.6629	0.4939	0.7744
Irs1	0.8069	0.9292	0.2606	0.393	0.3049	0.85	0.8803	0.5841	0.4424	0.016	0.611	0.271
Slc2a4	0.1068	0.1322	0.6291	0.2503	0.3157	0.0399	0.2617	0.8656	0.1548	0.849	0.5753	0.2291
Ucp1	0.0119	0.0056	0.0762	0.4794	0.3072	0.8288	0.1955	0.0057	0.0396	0.5789	0.4319	0.5039
Cox8b	0.1873	0.2594	0.0749	0.1707	0.2182	0.4941	0.5088	0.6307	0.8461	0.3794	0.1756	0.2518
Cidea	0.1205	0.0778	0.8803	0.2623	0.7523	0.537	0.7254	0.0631	0.2539	0.9349	0.6176	0.012
Hsf1	0.0612	0.5862	0.8284	0.1575	0.8863	0.1827	0.0675	0.4394	0.0011	0.7323	0.3889	0.5882
Grp94	0.1044	0.7128	0.088	0.7575	0.7988	0.7097	0.0034	0.0072	0.4624	0.1727	0.233	0.5937
Bip	0.0434	0.7284	0.277	0.4453	0.4186	0.8017	0.0005	0.0092	0.6493	0.0255	0.3719	0.6335
Chop	0.0691	0.0318	0.4308	0.0032	0.0879	0.1602	0.3073	0.4972	0.0054	0.5777	0.4366	0.391

## Sheet: S2_P values_Sed_Liver
Table S2.
	ApoB vs. WT		Female vs. Male
	Liver		Liver
	male	female	WT	ApoB
ApoA5	0.0297	0.0334	0.2757	0.1024
ApoC2	0.0925	0.8656	0.23	0.5796
Fgf21	0.642	0.2388	0.81	0.1824
Ahsg	0.6795	0.7014	0.0371	0.0117
Tnf	0.3808	0.5957	0.1063	0.9872
Il1b	0.8446	0.7733	0.356	0.4242
Tgfb1	0.2647	0.3424	0.2573	0.0494
Il10	0.9286	0.7921	0.0668	0.0044
Lepr	0.0559	0.9417	0.0013	0.0165
Cd36	0.0082	0.0022	0.0864	0.0653
Insr	0.0492	0.893	0.5779	0.2167
Irs1	0	0.6055	0.2107	0.0521
AdipoR1	0.1092	0.2069	0.5806	0.7612
AdipoR2/1	0.2353	0.7484	0.2569	0.7262
AdipoR2/2	0.1465	0.3903	0.0438	0.8785
Hsf1	0.3033	0.6612	0.5787	0.892
Grp94	0.9142	0.9149	0.6482	0.7487
Bip	0.3947	0.2791	0.5813	0.0205
Chop	0.5387	0.4468	0.0025	0.4092

## Sheet: S3_BAT_Lipid_mol%
Table S3. Lipidomic dataset for BAT lipid compositional data
	mol% of membrane lipids																P value
Lipid species	Sedentary								Run								WT/ND vs APOB/HFD, Sedentary				Male vs Female, Sedentary				Trained vs Sedentary
	Male WT/ND		Male APOB/HFD		Female WT/ND		Female APOB/HFD		Male WT/ND		Male APOB/HFD		Female WT/ND		Female APOB/HFD		Male		Female		WT/ND		APOB/HFD		Male WT/ND		Male APOB/HFD		Female WT/ND		Female APOB/HFD
	mean	SEM	mean	SEM	mean	SEM	mean	SEM	mean	SEM	mean	SEM	mean	SEM	mean	SEM
LPC(16:1)	0.00354652	0.00150589	0.000961295	0.000503321	0.00299344	0.0010627	0.00173283	0.000708702	0.00634748	0.00358079	0.000947087	0.000665534	0.00116986	0.000457378	0.00125933	0.000711447	0.117719		0.327454		0.770871		0.384364		0.465325		0.986344		0.119148		0.641916
LPC(16:0)	0.674213	0.0340424	0.465966	0.0379376	0.632857	0.0310192	0.563331	0.0230282	0.691068	0.0418067	0.554557	0.0269306	0.497731	0.0230202	0.505567	0.020626	0.000489591	***	0.0830114		0.382272		0.0390972	*	0.755926		0.0819723		0.00194887	**	0.0750651
LPC(18:2)	0.412329	0.0416936	0.280573	0.0507931	0.559139	0.0613231	0.542288	0.0433444	0.452699	0.0835598	0.364179	0.0364468	0.404481	0.041719	0.318962	0.0383096	0.0574207		0.8223		0.0574801		0.000733851	***	0.661761		0.212664		0.0463933		0.000846853	***
LPC(18:1)	0.142393	0.0140064	0.214673	0.0352657	0.153565	0.0205555	0.290826	0.0220558	0.186541	0.0391337	0.275711	0.0199664	0.0833229	0.0136543	0.19899	0.026436	0.0699592		0.000183377	***	0.65314		0.0807032		0.284056		0.169466		0.00871661	**	0.0140677	*
LPC(18:0)	0.604136	0.0444832	0.687942	0.0558302	0.82574	0.0517452	0.962661	0.0224186	0.589829	0.0611463	0.73403	0.0216709	0.651905	0.0374153	0.725636	0.0562128	0.25295		0.0206792	*	0.00371319	**	0.000151316	***	0.849942		0.483078		0.0118263	*	0.000739041	***
LPC(20:4)	0.00393763	0.00137311	0.0253344	0.00522751	0.043314	0.00922562	0.130068	0.0255426	0.00505317	0.00194224	0.00985702	0.00251142	0.0305253	0.00722906	0.0563914	0.0130131	0.000666792	***	0.00564991	**	0.000244124	***	0.000578547	***	0.639462		0.0211461	*	0.283352		0.0174612	*
LPC	1.84056	0.0981724	1.67545	0.16393	2.21761	0.135385	2.49091	0.107036	1.93154	0.215192	1.93928	0.0853673	1.66913	0.110678	1.80681	0.138365	0.396866		0.125147		0.0329764	*	0.000403056	***	0.696194		0.193961		0.00473273	**	0.000749779	***
PC(32:2)	0.107515	0.0124109	0.0232482	0.00376276	0.0815304	0.00867243	0.031858	0.00523732	0.21367	0.0284456	0.0813944	0.0103404	0.0986669	0.00798518	0.0485177	0.00702375	1.54946e-06	***	5.99132e-05	***	0.106472		0.195496		0.00201311	**	1.5203e-05	***	0.160119		0.0704169
PC(32:1)	0.940632	0.0511175	0.618141	0.0875219	0.510004	0.0739627	0.366975	0.0271653	1.20484	0.112704	0.748071	0.0322496	0.437882	0.036577	0.500404	0.0679056	0.00431338	**	0.0743544		8.36979e-05	***	0.0119323	*	0.0393394	*	0.211378		0.379648		0.0817095
PC(32:0)	0.782711	0.0682656	0.39834	0.0374135	0.729094	0.0376097	0.43585	0.026697	0.880529	0.0790726	0.412506	0.0320199	0.765064	0.0455678	0.531972	0.0610823	6.12838e-05	***	2.19431e-06	***	0.509863		0.423177		0.357512		0.78151		0.553346		0.163407
PC(34:3)	1.03631	0.0499739	0.301566	0.0239465	0.65453	0.0478134	0.238785	0.0235744	1.14858	0.0528768	0.513982	0.0243657	0.604702	0.0304728	0.266673	0.0245042	5.71945e-12	***	8.10268e-08	***	1.86774e-05	***	0.0750953		0.137527		4.95225e-06	***	0.38123		0.420924
PC(34:2)	11.5338	0.1744	6.88693	0.287012	9.63292	0.269503	5.70854	0.166635	12.0785	0.297497	7.89972	0.120682	9.49555	0.209705	6.20088	0.230771	2.46522e-12	***	2.86082e-11	***	5.61034e-06	***	0.00179218	**	0.121752		0.00660602	**	0.6888		0.0976978
PC(34:1)	5.03398	0.231491	6.15543	0.242842	3.85468	0.264957	4.90537	0.146772	5.05676	0.174379	6.87576	0.181627	3.31838	0.133572	5.13749	0.149094	0.0029481	**	0.00190131	**	0.00292346	**	0.00022406	***	0.938972		0.0327287	*	0.0777389		0.279189
PC(36:5)	0.222132	0.041595	0.0864136	0.0108848	0.213132	0.0254257	0.102772	0.0117734	0.342853	0.05615	0.123347	0.0157297	0.289833	0.0259425	0.175451	0.0332299	0.00457661	**	0.000573964	***	0.85846		0.318711		0.0951639		0.0614721		0.0474641		0.051256
PC(36:4)	5.37182	0.22322	4.67987	0.372306	5.71999	0.149421	4.54593	0.126955	6.40832	0.472196	4.02452	0.216043	5.97907	0.121108	5.92248	0.907608	0.125201		5.64334e-06	***	0.217359		0.736713		0.0540928		0.164469		0.189139		0.147303
PC(36:3)	6.46256	0.230525	4.84551	0.145051	4.75163	0.177975	4.36704	0.143339	5.92798	0.366581	5.61629	0.172245	4.52762	0.189533	4.25197	0.220612	5.64393e-06	***	0.104641		9.38458e-06	***	0.0283789	*	0.222537		0.00253579	**	0.400887		0.666084
PC(36:2)	12.1658	0.393695	12.1859	0.418352	13.6978	0.554883	12.4849	0.198818	11.157	0.796948	12.7145	0.392632	14.7284	0.512824	11.2166	0.7097	0.972365		0.0451767		0.0330359	*	0.525313		0.256979		0.374779		0.186309		0.0993136
PC(36:1)	1.75041	0.105515	3.18008	0.0943225	1.5926	0.0780566	2.96427	0.0570635	1.60213	0.144046	3.28827	0.0805162	1.43826	0.0469743	2.73713	0.170834	1.0039e-09	***	2.49517e-12	***	0.249502		0.0630788		0.410144		0.404137		0.09867		0.220488
PC(38:6)	1.8853	0.362697	1.8345	0.38085	2.35457	0.188563	1.7109	0.0990051	3.70496	0.936379	1.34756	0.22013	2.66835	0.296415	2.99912	0.784873	0.923926		0.00545662	**	0.276655		0.7564		0.0751254		0.306695		0.391616		0.117674
PC(38:5)	1.11093	0.0903596	1.47742	0.114823	1.03368	0.0437712	1.3026	0.0374661	1.50439	0.215251	1.24238	0.0611763	1.0771	0.0410434	1.48326	0.154687	0.0200019	*	0.000124638	***	0.463293		0.161882		0.0967911		0.103999		0.476876		0.268546
PC(38:4)	2.49446	0.1162	5.41697	0.283039	4.3537	0.245729	6.7535	0.362967	2.63075	0.133833	3.56636	0.171786	4.66859	0.164807	5.69208	0.23226	2.76184e-09	***	2.4912e-05	***	6.09738e-07	***	0.00823409	**	0.448498		3.35405e-05	***	0.291963		0.0220682	*
PC(38:3)	0.351724	0.0340908	0.783848	0.0306723	0.331927	0.0208149	0.774433	0.0362995	0.395306	0.0330318	0.734111	0.0263208	0.444098	0.0197318	0.762376	0.0307839	3.51936e-09	***	1.11296e-09	***	0.632915		0.844784		0.370587		0.243108		0.000800257	***	0.80237
PC(40:8)	0.30258	0.0747069	0.0752388	0.0241054	0.559943	0.0588805	0.240543	0.0480996	0.472749	0.102641	0.0498936	0.0207948	0.690656	0.0241827	0.332886	0.0521968	0.00838033	**	0.000373774	***	0.014266	*	0.00557221	**	0.189227		0.445372		0.0461682		0.206724
PC(40:7)	0.134293	0.0452555	0.0821626	0.0241732	0.120027	0.0171992	0.0960342	0.0156788	0.325951	0.105919	0.0536392	0.0202536	0.220458	0.0300772	0.225132	0.0580635	0.320656		0.313259		0.778758		0.634957		0.100982		0.388174		0.0100651	*	0.0431167	*
PC(40:6)	0.49844	0.155744	0.864657	0.268366	0.880801	0.0848884	0.892526	0.0853133	1.06394	0.255865	0.475783	0.160935	1.10317	0.130858	1.28022	0.326537	0.2505		0.923482		0.0479621		0.922062		0.0679079		0.251647		0.176965		0.263006
PC(40:5)	0.029872	0.0145322	0.0744644	0.0261264	0.0211902	0.00391344	0.0275041	0.00633853	0.118399	0.0494391	0.0373838	0.0227255	0.0532804	0.0126173	0.139564	0.0542857	0.150011		0.41632		0.585193		0.0946287		0.0888642		0.307158		0.0293419	*	0.0524335
PC	52.2153	0.733063	49.9707	1.26576	51.0937	0.783642	47.9503	0.728205	56.2376	1.21048	49.8054	0.639873	52.6092	0.459859	49.9042	1.80281	0.139161		0.00777835	**	0.307335		0.180376		0.00859472	**	0.913863		0.103375		0.325866
LPE(16:1)	0.0420422	0.00644213	0.0103104	0.00213384	0.0299477	0.00487608	0.0118708	0.00104725	0.0359352	0.00566007	0.0134554	0.00095741	0.0109739	0.00231496	0.006513	0.00144817	0.00011582	***	0.00110488	**	0.154813		0.51835		0.487568		0.223442		0.00163024	**	0.00662637	**
LPE(16:0)	0.107112	0.00934946	0.0550972	0.00345679	0.114774	0.00982716	0.0685866	0.00420685	0.0866045	0.00980038	0.0542883	0.00225731	0.0583629	0.00826246	0.0523252	0.00568531	3.11159e-05	***	0.000219331	***	0.578005		0.021394	*	0.144859		0.853357		0.000238198	***	0.0313587	*
LPE(18:2)	0.0815535	0.00711605	0.0436088	0.00494305	0.0930937	0.00551611	0.0630519	0.00436396	0.0701362	0.00915363	0.0506324	0.00398737	0.0524858	0.00516094	0.0447703	0.0054617	0.000238823	***	0.000311071	***	0.219753		0.00742476	**	0.331541		0.295134		2.4498e-05	***	0.0158101	*
LPE(18:1)	0.248694	0.0204479	0.190187	0.0145229	0.25962	0.0211272	0.230494	0.0138184	0.221992	0.0286738	0.213543	0.012806	0.130872	0.017939	0.160841	0.0175661	0.0292058	*	0.253918		0.714039		0.0567719		0.450942		0.251093		0.000130891	***	0.00502721	**
LPE(18:0)	0.190211	0.0177749	0.166623	0.0107362	0.274867	0.0186372	0.244613	0.0156112	0.172308	0.0180287	0.148241	0.00769198	0.146288	0.022882	0.176639	0.0158458	0.268219		0.224329		0.00350952	**	0.000454168	***	0.487844		0.19539		0.000310444	***	0.00579288	**
LPE(20:4)	0.146244	0.0146299	0.170128	0.0188174	0.209975	0.0118007	0.254122	0.0129404	0.114232	0.0164454	0.151483	0.0125962	0.125227	0.00969545	0.172739	0.0224473	0.327221		0.0205385	*	0.00302033	**	0.00131858	**	0.159296		0.439738		1.51859e-05	***	0.00474709	**
LPE(20:0)	0.0213078	0.00454333	0.0220205	0.00408381	0.026205	0.00254725	0.0244045	0.00211553	0.0197909	0.00208456	0.0178697	0.00191803	0.0157667	0.00162541	0.0225989	0.00523285	0.908185		0.589943		0.369628		0.609396		0.771447		0.399177		0.00205513	**	0.752072
LPE(22:6)	0.0434467	0.00305703	0.0219275	0.00341938	0.0703939	0.00479633	0.0429431	0.00238802	0.0441989	0.00366856	0.0196096	0.00186796	0.0503716	0.00370574	0.0341144	0.00337917	0.000111434	***	3.25713e-05	***	9.13766e-05	***	4.7954e-05	***	0.875561		0.580537		0.0031394	**	0.0442658	*
LPE(22:0)	0.00832878	0.0080071	0.00221495	0.0011683	0.00208684	0.00146592	0.000569521	0.000377469	0.0557446	0.00725558	0.0413378	0.00911233	0.00725969	0.0027117	0.00610521	0.00208644	0.457932		0.30892		0.47065		0.193865		0.000274686	***	0.00014702	***	0.117041		0.0159592	*
LPE	0.88894	0.0713835	0.682117	0.0514578	1.08096	0.0673243	0.940656	0.0467687	0.820942	0.0853682	0.71046	0.0465619	0.597607	0.0680407	0.676646	0.0718416	0.0281348	*	0.0972171		0.064914		0.00119658	**	0.545288		0.692574		5.48802e-05	***	0.00547788	**
PE(32:1)	0.0666556	0.00688187	0.0154929	0.00297346	0.0293466	0.00703887	0.0121898	0.00195945	0.0571029	0.00635719	0.0278615	0.0021423	0.0199417	0.00268743	0.0135572	0.00220882	7.4198e-07	***	0.0236203	*	0.00108149	**	0.363692		0.322134		0.00401164	**	0.210979		0.64783
PE(34:2)	1.13998	0.0691414	0.32466	0.0370704	0.844436	0.0580798	0.35357	0.0324488	0.937653	0.0903038	0.474756	0.0295507	0.751295	0.0391925	0.322607	0.0531863	5.96391e-10	***	2.07581e-07	***	0.00391123	**	0.563306		0.0867591		0.00597942	**	0.191435		0.624133
PE(34:1)	0.234151	0.0129525	0.172076	0.0088904	0.158144	0.0144937	0.156101	0.00718755	0.196787	0.0110266	0.192127	0.0066102	0.13524	0.00865993	0.162347	0.0102572	0.000679131	***	0.898079		0.000781772	***	0.176245		0.041078	*	0.0959135		0.180894		0.622921
PE(36:5)	0.320849	0.0352294	0.103467	0.0299142	0.191699	0.0206256	0.0661089	0.0217225	0.183817	0.0387241	0.0910702	0.0230289	0.146535	0.0228273	0.0212111	0.013643	0.000108254	***	0.000428015	***	0.00555706	**	0.323238		0.0158717	*	0.753834		0.159512		0.0940013
PE(36:4)	3.06339	0.188047	2.12324	0.156621	2.8389	0.179098	2.25065	0.117065	2.20113	0.236007	2.39356	0.111121	2.41535	0.104862	2.10127	0.24536	0.000886785	***	0.0108431	*	0.399045		0.521395		0.00893773	**	0.190889		0.0495939		0.588204
PE(36:3)	2.49472	0.113321	1.77281	0.134424	1.88374	0.0745652	1.6167	0.0908323	2.00561	0.207155	2.42863	0.102048	1.7365	0.0434062	1.6616	0.178573	0.000465668	***	0.0354434	*	0.00024011	***	0.346405		0.0460948		0.00123817	**	0.0960031		0.824751
PE(36:2)	1.61108	0.044341	1.59249	0.0401149	1.72613	0.0599184	1.71149	0.065978	1.42418	0.0627769	1.6312	0.0352761	1.62264	0.0233629	1.71402	0.0960992	0.758794		0.871878		0.133393		0.137543		0.0224222	*	0.485931		0.111258		0.982898
PE(36:1)	0.157785	0.00764509	0.181802	0.00641615	0.132644	0.00790964	0.178468	0.00637252	0.145839	0.0098315	0.185874	0.00614416	0.117892	0.00750269	0.193878	0.0127332	0.024952	*	0.000175905	***	0.0328514	*	0.715825		0.343962		0.655795		0.190218		0.290839
PE(38:7)	0.145459	0.0106358	0.0380524	0.0052065	0.116409	0.00445272	0.0452567	0.00418035	0.131956	0.0113287	0.0503419	0.00440441	0.115576	0.00692482	0.035379	0.0066209	6.91122e-09	***	1.23428e-10	***	0.0237474	*	0.292294		0.394269		0.0938411		0.921981		0.220346
PE(38:6)	1.50774	0.0562418	0.896208	0.0426298	1.51381	0.0576714	1.01541	0.0268099	1.48858	0.0742792	0.923508	0.0406379	1.6285	0.0508129	1.09722	0.0617413	1.52843e-08	***	7.29225e-08	***	0.940736		0.027146	*	0.837409		0.652271		0.149062		0.237095
PE(38:5)	4.14455	0.181536	5.07725	0.333768	3.72843	0.12444	4.79102	0.151353	2.99276	0.310601	5.51046	0.241674	3.39701	0.0921685	4.39055	0.463654	0.0224713	*	2.54303e-05	***	0.0774336		0.443118		0.00366585	**	0.323277		0.0420647	*	0.420407
PE(38:4)	6.77769	0.320632	10.9332	0.625843	8.83189	0.350176	12.6308	0.376523	5.32408	0.471188	9.76076	0.294767	8.21869	0.447923	11.4121	0.932909	6.02153e-06	***	3.12124e-07	***	0.00029141	***	0.0297404	*	0.0171233	*	0.128143		0.299077		0.238624
PE(38:3)	0.112115	0.0072625	0.112188	0.0046083	0.0630219	0.00430128	0.0986453	0.00405111	0.107393	0.00505051	0.142451	0.00611542	0.055086	0.00608589	0.115309	0.00728851	0.993219		5.47904e-06	***	1.22162e-05	***	0.0380299	*	0.605464		0.000664696	***	0.307005		0.0581822
PE(38:2)	0.12846	0.01703	0.102594	0.00596649	0.130346	0.00914313	0.0999155	0.00723582	0.118845	0.00912283	0.10489	0.00734914	0.109553	0.00507941	0.109108	0.0146589	0.165787		0.0155705	*	0.925196		0.777879		0.63293		0.808753		0.054834		0.579598
PE(38:1)	0.0138154	0.00170029	0.0221659	0.00250362	0.0104904	0.00135957	0.0212931	0.00204293	0.0172748	0.00185931	0.0243396	0.00145677	0.0132753	0.000783656	0.0263458	0.00414017	0.011445	*	0.000303515	***	0.146128		0.789592		0.183345		0.485035		0.0841517		0.285605
PE(40:8)	0.139648	0.0193725	0.0746234	0.0148267	0.145481	0.00851509	0.0720251	0.00391673	0.220325	0.0419552	0.0610983	0.00712354	0.166722	0.00961156	0.0929229	0.0150121	0.0141306	*	7.24825e-08	***	0.792054		0.867009		0.0868772		0.449815		0.115487		0.191704
PE(40:7)	0.95123	0.0643705	0.579355	0.0269797	0.920961	0.0694879	0.654653	0.0203588	0.952055	0.0558276	0.628379	0.0456213	1.04135	0.0558662	0.649265	0.0389849	2.38961e-05	***	0.000999126	***	0.752102		0.0364352	*	0.992427		0.347613		0.187965		0.903615
PE(40:6)	1.20083	0.146338	1.41233	0.243693	1.60581	0.113303	1.45178	0.10941	1.91111	0.321615	1.10579	0.145465	1.87964	0.129794	1.98968	0.373829	0.464725		0.339422		0.0425321	*	0.883925		0.051082		0.317285		0.129839		0.181159
PE(40:5)	0.184747	0.0189275	0.284828	0.033252	0.144548	0.00876723	0.171278	0.0128848	0.267367	0.0390014	0.231355	0.0224403	0.143394	0.0103221	0.273147	0.0520264	0.0157862	*	0.107016		0.075614		0.00428937	**	0.0636602		0.216219		0.933484		0.0705368
PE(40:4)	0.0911761	0.00460451	0.114469	0.00614613	0.117214	0.00428306	0.124211	0.00515141	0.0990428	0.00775489	0.0923941	0.00273645	0.113227	0.00576835	0.130458	0.00640392	0.00610692	**	0.312958		0.000489107	***	0.237322		0.383489		0.00611553	**	0.590404		0.455255
PE(42:7)	0.00964035	0.00299139	0.00182771	0.000543271	0.0028885	0.000714914	0.00263058	0.000522789	0.0229964	0.00574421	0.00351908	0.00111301	0.012861	0.00089521	0.00682008	0.0017147	0.0174788	*	0.771101		0.0472991		0.298476		0.0466504		0.165268		2.52699e-08	***	0.0289412	*
PE(42:6)	0.00443787	0.00176702	0.00163704	0.000490826	0.00454353	0.000712604	0.00215695	0.000638356	0.0163385	0.00450494	0.00215892	0.000863239	0.0120647	0.0016884	0.0102066	0.00396436	0.140952		0.0206835	*	0.957745		0.525179		0.0190307	*	0.58962		0.000694805	***	0.057457
PE	24.5001	0.718588	25.9367	0.921425	25.1409	0.722671	27.5263	0.644953	20.8223	0.967573	26.0665	0.613421	23.8524	0.553031	26.529	1.49989	0.231897		0.0221374	*	0.537008		0.171554		0.0055956	**	0.911766		0.167353		0.547575
PE-P(32:1)	0.0210698	0.00250955	0.00244269	0.000410493	0.00324933	0.000525983	0.000766351	0.000169134	0.0232504	0.00201088	0.00587333	0.00161144	0.00592539	0.00160129	0.0014261	0.000570086	2.46907e-07	***	0.000134076	***	1.34877e-06	***	0.00104046	**	0.510064		0.0366301	*	0.141042		0.279202
PE-P(34:2)	0.277029	0.0144863	0.0841397	0.00502241	0.151528	0.00776493	0.0651644	0.00274229	0.26909	0.0211983	0.143891	0.0146878	0.15401	0.0152813	0.0759515	0.00409402	1.59586e-11	***	4.49951e-10	***	2.60615e-07	***	0.00314034	**	0.756755		0.000509424	***	0.889354		0.0394861	*
PE-P(34:1)	0.125122	0.01316	0.0926634	0.0107678	0.0966243	0.00862814	0.0689399	0.00482679	0.137148	0.0118295	0.104766	0.00890225	0.0994255	0.0110309	0.0934931	0.0142565	0.069404		0.00929887	**	0.0903116		0.0568009		0.50704		0.408719		0.845354		0.117064
PE-P(34:0)	0.0050139	0.000944816	0.00329221	0.000672221	0.00374485	0.000747434	0.00252476	0.000423379	0.00879078	0.00189628	0.00492234	0.00113834	0.00845711	0.0011271	0.0100215	0.00377343	0.151789		0.161316		0.309943		0.344526		0.0814856		0.214368		0.00258919	**	0.0610285
PE-P(36:5)	0.0255768	0.00220377	0.000127941	0.000127941	0.00682515	0.00168545	0.000274221	0.000166953	0.0236039	0.00293162	0.0036919	0.00184215	0.0114882	0.00276829	0.000310826	0.000217489	8.55154e-11	***	0.00058396	***	1.34257e-06	***	0.494057		0.592326		0.0464721		0.1741		0.895004
PE-P(36:4)	1.06625	0.0425235	0.92755	0.0667422	0.874065	0.0554524	0.791959	0.0282513	0.901647	0.0790472	1.0763	0.0864775	0.877474	0.0653859	0.727624	0.0692622	0.0935953		0.190329		0.0112794	*	0.0747246		0.0743633		0.181757		0.968951		0.399032
PE-P(36:3)	0.104529	0.00531253	0.0473524	0.00443225	0.0411837	0.010543	0.0216831	0.00465777	0.103154	0.00668578	0.0768563	0.00933518	0.0513524	0.0109725	0.0144087	0.00577419	3.42879e-08	***	0.0960103		1.83395e-05	***	0.000614451	***	0.872615		0.00681792	**	0.512831		0.337471
PE-P(36:2)	0.306473	0.0406262	0.185887	0.0311362	0.30739	0.0230547	0.146287	0.0166342	0.336107	0.0325985	0.197621	0.0233619	0.307844	0.0237963	0.21455	0.0361775	0.0278056	*	1.07281e-05	***	0.984896		0.274047		0.579865		0.773877		0.989226		0.10052
PE-P(36:1)	0.142702	0.0354824	0.106406	0.0205375	0.147075	0.0144341	0.0824387	0.0124161	0.155597	0.0284163	0.103068	0.0169146	0.146162	0.0191859	0.119528	0.0248279	0.385562		0.00262679	**	0.913142		0.328797		0.781961		0.903972		0.970439		0.195178
PE-P(38:6)	0.467879	0.0365797	0.277484	0.0502681	0.447311	0.0404022	0.259347	0.0222867	0.600149	0.0810389	0.264626	0.0410945	0.515978	0.0417754	0.407821	0.113525	0.00570238	**	0.000434921	***	0.708976		0.744652		0.140581		0.849119		0.252204		0.212722
PE-P(38:5)	0.298753	0.0128087	0.236124	0.0234081	0.214744	0.0183096	0.149206	0.0196975	0.297583	0.0175185	0.242184	0.0367028	0.225887	0.0193551	0.122962	0.0345107	0.0283288	*	0.0244564	*	0.00101734	**	0.00950326	**	0.957021		0.887044		0.68136		0.515819
PE-P(38:4)	0.60041	0.0241926	0.590812	0.0393099	0.758132	0.0530025	0.665218	0.0318215	0.552839	0.0326309	0.647385	0.0405644	0.75262	0.0314243	0.716481	0.0384423	0.837201		0.140184		0.0110723	*	0.155402		0.249438		0.331231		0.928127		0.31548
PE-P(38:2)	0.0117407	0.00229258	0.000564494	0.000223586	0.0178428	0.00222943	0.00132931	0.000281697	0.0148279	0.00217501	0.00385201	0.00118584	0.0236236	0.000990163	0.00415113	0.000629103	7.54522e-05	***	1.57463e-07	***	0.0709794		0.0449142	*	0.341799		0.00747454	**	0.0236098	*	0.000479799	***
PE-P(40:7)	0.0183887	0.00946889	0.00813876	0.00813876	0.0140982	0.00818294	0	0	0.0611852	0.0276029	0.00453739	0.00453739	0.0327293	0.0129048	0.0047716	0.00322427	0.420498		0.0856936		0.737289		0.328183		0.143633		0.718641		0.245816		0.153079
PE-P(40:6)	0.1233	0.0224285	0.0101982	0.0101982	0.192558	0.0267883	0	0	0.189551	0.035717	0.0076318	0.0076318	0.242388	0.0145735	0.00416262	0.0033456	0.000142615	***	2.17021e-07	***	0.059252		0.328183		0.124612		0.847657		0.109242		0.226516
PE-P(40:5)	0.0723506	0.00667809	0.0576656	0.0148572	0.06827	0.00513857	0.0363867	0.00661124	0.0850266	0.0102268	0.0577073	0.0111909	0.0710713	0.00542693	0.0699517	0.0292786	0.377073		0.00115639	**	0.637743		0.204201		0.303308		0.998293		0.712772		0.275523
PE-P(40:4)	0.0794196	0.00420824	0.0789771	0.00388039	0.114968	0.0072695	0.0913574	0.0033959	0.0829674	0.00480367	0.0795757	0.00388312	0.116113	0.00516375	0.113065	0.00731719	0.939075		0.0064211	**	0.000300314	***	0.0252462	*	0.582895		0.914985		0.897764		0.0133449	*
PE-P(40:3)	0.00246144	0.000544302	0.00132348	0.00038329	0.00691455	0.0014293	0.00316283	0.000848534	0.00330234	0.0008548	0.00351638	0.00088767	0.013702	0.000884171	0.00872316	0.00122837	0.101448		0.0315827	*	0.00667065	**	0.0608887		0.407884		0.025692	*	0.000493661	***	0.00117841	**
PE-P(42:6)	0.00525338	0.00123365	8.72716e-05	3.79341e-05	0.0154951	0.00268552	0.000941776	0.000306348	0.00757109	0.00189508	0.000473449	0.000272702	0.0237294	0.00105526	0.00306639	0.00151374	0.000383361	***	1.38082e-05	***	0.00182504	**	0.0112159	*	0.309126		0.13986		0.00768134	**	0.18277
PE-P(42:5)	0.00253072	0.000592962	0.00037899	0.000193037	0.00453637	0.000950107	0.00128292	0.00032919	0.00225536	0.000536035	0.00226749	0.000713715	0.00852771	0.00100992	0.00248693	0.000514313	0.00227877	**	0.00302589	**	0.0824024		0.0270531	*	0.735573		0.0118551	*	0.0092723	**	0.0613455
PE-P	3.75625	0.150028	2.71162	0.129941	3.48655	0.246839	2.38827	0.0959824	3.85565	0.154959	3.03075	0.234601	3.68851	0.200848	2.71496	0.182187	2.79178e-05	***	0.000328827	***	0.35195		0.0578148		0.649816		0.227973		0.529544		0.12691
LPI(16:0)	0.00691629	0.00216879	0.00611722	0.000742834	0.0029473	0.000746914	0.00570207	0.00113143	0.00443471	0.000684499	0.00927429	0.00100765	0.00268415	0.000383599	0.00596888	0.0012866	0.73073		0.0594577		0.110125		0.761935		0.30538		0.0181491	*	0.751077		0.877665
LPI(18:2)	0.00441468	0.000781485	0.00132952	0.000315402	0.00451616	0.000808302	0.00335709	0.000588939	0.00316422	0.000514781	0.00255182	0.000240495	0.00357592	0.000627197	0.00276355	0.000569681	0.00137399	**	0.253884		0.928968		0.00608102	**	0.204247		0.00737915	**	0.364092		0.47647
LPI(18:1)	0.116188	0.00814614	0.154453	0.010779	0.0948216	0.00773007	0.11154	0.0093292	0.072472	0.00328764	0.101168	0.00594402	0.0536782	0.00262428	0.0738484	0.00553428	0.00969988	**	0.186488		0.0720362		0.00643969	**	9.3615e-05	***	0.000570091	***	3.5564e-05	***	0.00215034	**
LPI(18:0)	0.0852716	0.00682333	0.104067	0.00738196	0.0729792	0.00494563	0.104957	0.00667231	0.0680296	0.00779219	0.119684	0.00844673	0.0644462	0.00393158	0.0976299	0.013952	0.0748935		0.00106498	**	0.16584		0.929503		0.109466		0.177433		0.187643		0.640326
LPI(20:4)	0.0963028	0.00582959	0.078347	0.00732263	0.126039	0.00655609	0.107045	0.00465259	0.0857581	0.00978456	0.0911475	0.00430373	0.0919011	0.00562204	0.0942004	0.0107687	0.0681292		0.0260735	*	0.00269262	**	0.00320148	**	0.355574		0.168241		0.000693837	***	0.285371
LPI	0.309093	0.0134444	0.344313	0.0141897	0.301303	0.0134396	0.332602	0.0130796	0.233859	0.0172059	0.323826	0.0154067	0.216286	0.00984545	0.274411	0.0266601	0.0853027		0.11022		0.686685		0.550149		0.00225054	**	0.340098		4.07091e-05	***	0.0628388
PI(36:4)	0.169554	0.00863769	0.120742	0.00634684	0.123501	0.0094045	0.105969	0.00377191	0.160486	0.0100188	0.133893	0.00364469	0.116591	0.00420306	0.106064	0.00582684	0.000155956	***	0.0884685		0.00163098	**	0.0578853		0.498507		0.104258		0.497311		0.989272
PI(36:3)	0.102289	0.00803091	0.0970076	0.00688622	0.0647724	0.00909766	0.0785416	0.00680254	0.071958	0.00415349	0.0947671	0.00371599	0.0532911	0.00576366	0.0606524	0.00735778	0.622559		0.233928		0.00538568	**	0.0695649		0.0037134	**	0.789792		0.290114		0.0880164
PI(36:2)	0.200167	0.0203479	0.20279	0.0138315	0.158358	0.0131882	0.194808	0.0139394	0.210469	0.0196682	0.191601	0.00914545	0.156627	0.0157818	0.163955	0.0124996	0.916072		0.0725027		0.105866		0.688314		0.720429		0.525948		0.934402		0.113588
PI(36:1)	0.0180929	0.00216991	0.0363285	0.00250768	0.0169718	0.00152525	0.0415231	0.00336271	0.0202344	0.00180959	0.0340501	0.00190131	0.0176342	0.00155776	0.0343736	0.00287285	1.588e-05	***	2.18041e-06	***	0.682006		0.228641		0.461374		0.491932		0.764915		0.120236
PI(38:6)	0.0198444	0.00147215	0.0089509	0.000917511	0.0162956	0.00144504	0.00926479	0.000950031	0.0183478	0.00139622	0.0123811	0.000553624	0.0149078	0.000925498	0.0123284	0.000938979	2.5489e-06	***	0.000473134	***	0.100978		0.814344		0.470821		0.00643624	**	0.419785		0.0317394	*
PI(38:5)	0.368095	0.0307927	0.422528	0.0303501	0.246562	0.026322	0.323263	0.0251997	0.301362	0.0163902	0.443305	0.0138718	0.203936	0.0124381	0.281732	0.027076	0.221231		0.0475187		0.00725219	**	0.0196527	*	0.0765746		0.5669		0.14713		0.273626
PI(38:4)	3.69282	0.0769767	3.38124	0.0672227	3.70837	0.103029	3.14441	0.0795515	3.75525	0.0863239	3.35632	0.0571787	3.88458	0.0889091	3.57453	0.152743	0.00588714	**	0.000265261	***	0.903875		0.033079	*	0.593873		0.78559		0.207369		0.0204753	*
PI(38:3)	0.029338	0.0171432	0.142812	0.0438733	0.000293741	0.000197087	0.056807	0.0158736	0.0912059	0.0332128	0.140119	0.0217406	0.00235144	0.00235144	0.122867	0.0428704	0.0248095	*	0.00268752	**	0.120415		0.0787906		0.104414		0.95933		0.413816		0.162536
PI(40:6)	0.0332808	0.0130345	0.0467151	0.0159804	0.0367076	0.00767925	0.0299016	0.00704576	0.0873927	0.0279832	0.0308579	0.0093477	0.0468151	0.013551	0.0817675	0.0326288	0.521504		0.520006		0.827042		0.346154		0.0857654		0.426188		0.533549		0.13451
PI(40:5)	0.0255299	0.00627449	0.0329737	0.00930875	0.0145972	0.00232972	0.0181631	0.0034235	0.0502975	0.0130974	0.0278898	0.00543917	0.0182468	0.00375418	0.0431286	0.0146127	0.514162		0.407404		0.129787		0.149575		0.0942394		0.659559		0.428023		0.110407
PI	4.65901	0.0877376	4.49209	0.117969	4.38643	0.104954	4.00265	0.0958605	4.767	0.127896	4.46519	0.081138	4.51498	0.112397	4.4814	0.209228	0.268416		0.0132396	*	0.0580336		0.00394316	**	0.487619		0.858772		0.414927		0.0493585
LPS(18:1)	0.0175251	0.001392	0.0197342	0.0014663	0.0152377	0.00122366	0.0133942	0.00133586	0.0103188	0.000467147	0.0111072	0.000650516	0.0080421	0.00056645	0.00819753	0.000650194	0.286373		0.323252		0.234283		0.00416889	**	0.000113725	***	6.52987e-05	***	1.90413e-05	***	0.00203473	**
LPS(18:0)	0.0143813	0.0017935	0.0129245	0.00462323	0.0113089	0.000690988	0.00991991	0.000974301	0.0103589	0.000846297	0.0128207	0.000635563	0.0106485	0.000811018	0.0119127	0.000806435	0.771685		0.265703		0.137477		0.531383		0.0623861		0.984021		0.545714		0.129379
LPS(20:4)	0.00233206	0.000393113	0.00249721	0.000453938	0.00418661	0.000515834	0.00445375	0.000531122	0.00281686	0.000642519	0.00449454	0.00059751	0.00259953	0.000408496	0.00447803	0.000709419	0.78586		0.722731		0.00878264	**	0.0104276	*	0.518904		0.0135292	*	0.0240123	*	0.978382
LPS(22:6)	0.0059537	0.000704042	0.00478358	0.000863412	0.0113868	0.000873903	0.0102757	0.000795151	0.00721878	0.00119104	0.00812295	0.000599516	0.00976756	0.000752418	0.00892307	0.00118288	0.304975		0.356597		7.97583e-05	***	0.000114934	***	0.361306		0.00631769	**	0.172913		0.352939
LPS(22:0)	0.0983098	0.0082576	0.0481301	0.0055001	0.116673	0.00646842	0.0624354	0.00613045	0.0823921	0.0126572	0.0550791	0.00292864	0.0647494	0.00787298	0.0429261	0.00515308	4.58305e-05	***	4.83714e-06	***	0.0985893		0.0963867		0.296334		0.305598		5.43532e-05	***	0.0234034	*
LPS	0.138502	0.00871673	0.0880695	0.00597078	0.158793	0.00714667	0.100479	0.00575023	0.113105	0.0148337	0.0916244	0.00352806	0.0958071	0.00774492	0.0764375	0.00629208	9.13547e-05	***	2.37355e-06	***	0.0894262		0.148602		0.146738		0.631941		6.72171e-06	***	0.00996029	**
PS(32:1)	0.00596818	0.000697249	0.00316493	0.000547033	0.00718773	0.000626116	0.0044455	0.000462562	0.00742525	0.00104645	0.00677645	0.00069976	0.00737661	0.000472501	0.00707097	0.00080154	0.00450659	**	0.00183482	**	0.210211		0.0876356		0.252274		0.000523627	***	0.810081		0.00959254	**
PS(34:2)	0.0371628	0.00258718	0.0163749	0.0020887	0.0200256	0.00270473	0.0105785	0.0018537	0.0331399	0.00327585	0.0275948	0.00167169	0.0176085	0.00149661	0.0128583	0.00203717	2.71908e-06	***	0.00811596	**	0.000162916	***	0.0498252		0.342062		0.000591642	***	0.432713		0.416722
PS(34:1)	0.0108127	0.00206869	0.00442158	0.000847381	0.00654701	0.00095214	0.00358431	0.000768121	0.0122338	0.00162573	0.00927727	0.00112881	0.00763541	0.00133005	0.00721694	0.00152677	0.0091254	**	0.0236111	*	0.0835975		0.471858		0.599392		0.00223321	**	0.51986		0.0450168
PS(36:4)	0.0228322	0.00209638	0.0208385	0.00216039	0.0158977	0.00225967	0.0124754	0.00220016	0.0220098	0.00222701	0.0244709	0.00189958	0.0123506	0.00106542	0.0160047	0.00215835	0.51468		0.290532		0.0350813	*	0.0127251	*	0.790498		0.230461		0.159115		0.264473
PS(36:3)	0.0438292	0.00262216	0.0247358	0.00265041	0.0218366	0.00188864	0.0156095	0.00160128	0.0390994	0.00321093	0.0404435	0.00250967	0.0215763	0.00164863	0.0168319	0.00206691	3.93043e-05	***	0.0195224	*	1.25776e-06	***	0.00745069	**	0.263408		0.000397261	***	0.917929		0.644724
PS(36:2)	0.461459	0.0183285	0.349862	0.0136627	0.367874	0.0168154	0.281367	0.0139376	0.390342	0.017188	0.35252	0.0108685	0.333043	0.02115	0.255023	0.0150984	7.0199e-05	***	0.000670562	***	0.00120651	**	0.00197864	**	0.0103395	*	0.88397		0.21674		0.213175
PS(36:1)	0.273831	0.0644001	0.265613	0.0415244	0.294048	0.028505	0.2115	0.0235672	0.299313	0.0542647	0.237179	0.0332491	0.294486	0.0369658	0.269197	0.0488726	0.915568		0.0355363	*	0.783638		0.269265		0.767364		0.609267		0.992706		0.299139
PS(38:6)	0.0742723	0.00254481	0.0574067	0.00552873	0.0690345	0.0043229	0.0630697	0.0047561	0.0768067	0.00486967	0.0709138	0.00273274	0.0659676	0.00395033	0.0685323	0.00438536	0.0111426	*	0.366876		0.298586		0.445722		0.64125		0.0530373		0.605203		0.407538
PS(38:5)	0.0431934	0.002293	0.049016	0.0023777	0.0299115	0.00117531	0.0337443	0.00190848	0.0414581	0.00196964	0.0534066	0.00202826	0.0262526	0.00155836	0.035183	0.00274556	0.0918363		0.109207		5.81086e-05	***	5.1556e-05	***	0.575363		0.185127		0.0787454		0.671173
PS(38:4)	0.482184	0.0130907	0.606211	0.0201344	0.542133	0.0160014	0.58643	0.0126712	0.418514	0.0235709	0.577543	0.0157712	0.514382	0.0193455	0.567681	0.0378494	3.54175e-05	***	0.0400437	*	0.00817791	**	0.41463		0.0249087	*	0.29003		0.286398		0.643169
PS(38:3)	0.11675	0.00370757	0.126637	0.00746895	0.0880453	0.00418828	0.109924	0.00417129	0.101316	0.00384263	0.141474	0.00449803	0.0930704	0.0032401	0.108812	0.005019	0.248408		0.00134533	**	4.20864e-05	***	0.0635755		0.00877367	**	0.121526		0.348912		0.866277
PS(38:2)	0.0171425	0.00220864	0.0116222	0.00109821	0.0118825	0.00051924	0.0110949	0.000962999	0.0147583	0.000874014	0.0152218	0.00129227	0.0147519	0.000796285	0.0108718	0.000812499	0.0356691	*	0.490904		0.0371744	*	0.721518		0.343022		0.0451347		0.00749491	**	0.861081
PS(38:1)	0.0632403	0.00919314	0.0473021	0.00328047	0.05104	0.00413977	0.0427417	0.00312315	0.0401095	0.00427275	0.0410074	0.00433931	0.0533379	0.00433421	0.0291281	0.0027889	0.116731		0.120725		0.253983		0.324959		0.0380871	*	0.252639		0.706418		0.0036608	**
PS(38:0)	0.0192067	0.00384689	0.0253313	0.0043847	0.0102811	0.00188567	0.0228908	0.00257567	0.00624051	0.00203799	0.0220027	0.00420589	0.00974504	0.00156017	0.00965766	0.00195533	0.305119		0.000846174	***	0.0559152		0.636015		0.00857611	**	0.594489		0.827619		0.000481757	***
PS(40:7)	0.0858055	0.00432837	0.0703228	0.00341502	0.0671752	0.00275081	0.0587502	0.00260871	0.0804571	0.003347	0.0815282	0.00392597	0.0762503	0.00252082	0.0602163	0.00345041	0.0102426	*	0.0373049	*	0.00186168	**	0.0132876	*	0.345724		0.0427934	*	0.0237884	*	0.737875
PS(40:6)	0.581285	0.0509166	0.682483	0.0539933	0.706013	0.0402811	0.665518	0.0298065	0.698413	0.0677048	0.600116	0.0346085	0.81112	0.0536881	0.763704	0.05691	0.186491		0.422837		0.0715832		0.785826		0.176815		0.234543		0.137673		0.140673
PS(40:5)	0.103118	0.00747493	0.140712	0.00969004	0.0802034	0.00425336	0.088259	0.00462043	0.126506	0.0144328	0.122528	0.00854596	0.0797841	0.00551653	0.120311	0.0160005	0.00557957	**	0.216096		0.0167353	*	6.94416e-05	***	0.154965		0.183109		0.953202		0.0673125
PS(40:4)	0.08344	0.00355107	0.0911045	0.00259657	0.0967778	0.00412965	0.0915403	0.00192336	0.0797668	0.00634837	0.081825	0.00334459	0.0975108	0.00503512	0.0912366	0.0040635	0.0954234		0.250211		0.0226067	*	0.893962		0.610963		0.0377167	*	0.912393		0.946764
PS(40:3)	0.0229396	0.00429097	0.0215024	0.00260871	0.0215481	0.00257005	0.0261686	0.00294715	0.0140851	0.00304459	0.0165682	0.00275449	0.0235694	0.0023795	0.0168114	0.00235863	0.7774		0.254306		0.788366		0.248443		0.112808		0.20972		0.569421		0.0213266	*
PS(40:2)	0.0393585	0.00546399	0.0326246	0.00333857	0.0282387	0.00219753	0.0313008	0.00228971	0.0232634	0.00172564	0.0317125	0.00268307	0.0295154	0.00230071	0.020963	0.00195369	0.304376		0.347404		0.0821858		0.746765		0.0132758	*	0.838158		0.693441		0.0023674	**
PS(40:1)	0.0701648	0.0128896	0.0699732	0.00536627	0.0705524	0.00628428	0.070228	0.00561671	0.0483234	0.00626271	0.0542622	0.00590474	0.0756643	0.00674305	0.0405442	0.00522167	0.989176		0.969562		0.979304		0.974135		0.153694		0.0628543		0.586961		0.00082641	***
PS(42:5)	0.00888811	0.00326614	0.00368639	0.00103107	0.0105927	0.00179463	0.00521495	0.00119139	0.0104309	0.00363732	0.00506315	0.00166865	0.0137423	0.000923358	0.00570654	0.0013211	0.143068		0.0191886	*	0.66034		0.342519		0.754738		0.475478		0.124454		0.784869
PS(42:4)	0.00901576	0.00152742	0.00586203	0.0012134	0.00932785	0.000804225	0.00725029	0.000944394	0.00842662	0.00145925	0.00688203	0.00115394	0.0121566	0.000532248	0.00543103	0.000810417	0.120195		0.111858		0.862004		0.376373		0.783914		0.554569		0.0071282	**	0.157908
PS(42:3)	0.0108168	0.00238316	0.0213226	0.00365685	0.016037	0.00258426	0.0321034	0.00406962	0.00619988	0.0014514	0.0105689	0.00231952	0.0179439	0.00180519	0.0126032	0.00200293	0.0249228	*	0.00371179	**	0.151739		0.0614999		0.120604		0.0280612	*	0.546209		0.000290541	***
PS(42:2)	0.00823143	0.00342684	0.00508478	0.00123301	0.00738545	0.00143107	0.00350142	0.00101885	0.0106524	0.00294171	0.00527865	0.0016718	0.00993455	0.00161581	0.00646183	0.00221564	0.396906		0.0360237	*	0.827674		0.332978		0.600752		0.925088		0.254226		0.23764
PS(42:1)	0.0404356	0.015671	0.0282309	0.00825283	0.0442794	0.00584421	0.0165874	0.00476669	0.0523833	0.0134994	0.0221751	0.00697618	0.0458503	0.00779408	0.0276336	0.00895964	0.49797		0.00133262	**	0.826559		0.234749		0.572959		0.59043		0.875247		0.288182
PS	2.73538	0.188127	2.78145	0.0839055	2.69387	0.109597	2.50588	0.0602534	2.66167	0.152135	2.65834	0.085191	2.76463	0.143918	2.58569	0.114742	0.825122		0.138951		0.854117		0.0140598	*	0.766221		0.318928		0.703598		0.544304
LPG(16:1)	0.000961549	0.000196501	0.00335187	0.000812471	0.000583136	0.000188456	0.00185209	0.000308277	0.0013251	0.000285611	0.00446521	0.000691738	0.000921811	0.000145327	0.00217478	0.000352365	0.00911064	**	0.00248733	**	0.180743		0.0983859		0.299394		0.320327		0.165453		0.497882
LPG(16:0)	0.00186672	0.000398369	0.00296609	0.000416134	0.00176713	0.000403132	0.00423219	0.000405519	0.00174649	0.000236912	0.00355017	0.00056763	0.00179115	0.000177158	0.00391452	0.000361186	0.0694771		0.000316072	***	0.862388		0.0403223	*	0.802393		0.406929		0.955708		0.564507
LPG(18:2)	0.0145075	0.000517265	0.0218153	0.00289908	0.0152921	0.00106513	0.0195806	0.00124599	0.0119919	0.00105104	0.0184799	0.00226119	0.0170118	0.00155289	0.0164058	0.00174777	0.0212038	*	0.0169827	*	0.503497		0.486259		0.0387197	*	0.389663		0.37996		0.153288
LPG(18:1)	0.0211253	0.00159339	0.0868558	0.0110845	0.0193092	0.00125733	0.0667877	0.00450152	0.0171193	0.00135898	0.0728284	0.00964974	0.0201075	0.00171866	0.0550564	0.00554096	6.61096e-06	***	2.92943e-09	***	0.386884		0.107615		0.0718683		0.361375		0.715772		0.114547
LPG(18:0)	0.000539826	0.000227508	0.00189197	0.000489921	0.00132844	0.000147763	0.00347475	0.000501775	0.000983124	0.000196601	0.00189026	0.000347242	0.0014811	0.000268206	0.00320011	0.000459046	0.020226	*	0.00073724	***	0.00960898	**	0.0342788	*	0.158607		0.997841		0.632082		0.690235
LPG(20:4)	0.000186135	4.08068e-05	0.00172384	0.000354839	0.00035228	7.89682e-05	0.00159837	0.000304457	0.000184584	3.92076e-05	0.000868618	0.000168971	0.000638077	8.87335e-05	0.0016629	0.000309806	0.000286318	***	0.00103312	**	0.0690094		0.790916		0.978485		0.0548757		0.0263748	*	0.883249
LPG(22:6)	0.00126094	0.000334528	0.000673552	0.000187508	0.00233758	0.000254461	0.00136853	0.000248731	0.00209242	0.000594295	0.000769365	0.000215247	0.00539826	0.000548252	0.00184484	0.000382982	0.139858		0.0128055	*	0.0196401	*	0.0361837	*	0.226289		0.739523		7.38527e-05	***	0.308263
LPG(22:5)	4.44264e-05	1.58376e-05	0.000293834	8.47182e-05	4.44113e-05	1.45018e-05	0.000112745	3.8956e-05	0.000143395	4.51449e-05	0.000166077	4.58538e-05	0.000135298	2.51097e-05	0.000278062	0.000111824	0.00842386	**	0.127459		0.999451		0.0650416		0.0440748	*	0.225153		0.00595302	**	0.17662
LPG*	0.0404924	0.00217728	0.119572	0.0155482	0.0410143	0.00230103	0.099007	0.00628662	0.0355863	0.00335659	0.103018	0.0135687	0.0474849	0.00336089	0.0845374	0.00867618	4.81753e-05	***	4.03544e-08	***	0.870641		0.233073		0.226077		0.441498		0.133696		0.190591
PG(32:2)	0.00226252	0.000406056	0.00731853	0.0012707	0.000984275	0.000206637	0.00523964	0.000730125	0.00152808	0.000336295	0.00683915	0.00105397	0.00118565	0.00018701	0.00372202	0.00071027	0.00100495	**	2.38941e-05	***	0.0126017	*	0.170048		0.182521		0.780119		0.476802		0.150451
PG(32:1)	0.00238268	0.000663474	0.0145028	0.00337692	0.00127831	0.000601296	0.0116355	0.00189236	0.0025033	0.000567024	0.0106721	0.00266919	0.000739515	0.000259462	0.00881203	0.00110825	0.00192106	**	5.68022e-05	***	0.233959		0.466708		0.892369		0.398052		0.40602		0.2113
PG(32:0)	0.00149883	0.000809741	0.00714474	0.00112617	0.00132262	0.000204337	0.00766352	0.000714557	0.00225996	0.000581023	0.00549779	0.000838677	0.00187529	0.00033966	0.00835852	0.000880403	0.000507999	***	5.48324e-08	***	0.841374		0.701038		0.46079		0.270823		0.187392		0.546206
PG(34:3)	0.0308691	0.0018359	0.0459212	0.00614879	0.02466	0.00141039	0.0409406	0.0028067	0.0202624	0.00203596	0.0372742	0.00464015	0.0236715	0.0027879	0.0277904	0.00413034	0.0284165	*	5.48071e-05	***	0.015114	*	0.468982		0.000866227	***	0.29081		0.761425		0.0151791	*
PG(34:2)	0.10838	0.00617166	0.270799	0.0305799	0.0914695	0.00462855	0.229292	0.0155558	0.085402	0.0036727	0.228093	0.0261649	0.0936334	0.00575284	0.172829	0.0183541	3.2013e-05	***	5.87026e-08	***	0.042454	*	0.239201		0.00510675	**	0.312168		0.7749		0.0283476	*
PG(34:1)	0.123364	0.00466056	0.392229	0.0288034	0.123667	0.00767805	0.354913	0.01598	0.1336	0.0100754	0.324883	0.0219166	0.135894	0.0046136	0.32734	0.0122525	5.2324e-09	***	2.68396e-11	***	0.972958		0.269457		0.35364		0.0869926		0.178387		0.184731
PG(34:0)	0.00126527	0.000297354	0.0116315	0.00190137	0.00325405	0.000528914	0.0149365	0.00151061	0.00224604	0.000398806	0.00865894	0.00169539	0.0036919	0.000463159	0.0160742	0.00114888	2.0775e-05	***	6.01173e-07	***	0.00302453	**	0.187292		0.0593364		0.265934		0.538494		0.55499
PG(36:5)	0.00602432	0.000604521	0.00778699	0.00138764	0.0087186	0.000875202	0.00796351	0.000962404	0.00434252	0.000730173	0.00556284	0.00101717	0.00898797	0.000975867	0.00651827	0.000951546	0.256673		0.570186		0.0178625	*	0.917695		0.0885721		0.226963		0.840252		0.297157
PG(36:4)	0.0827181	0.00437423	0.107413	0.0143421	0.0991705	0.00971179	0.112527	0.00718722	0.0545889	0.00452612	0.0768045	0.00937317	0.106708	0.0138071	0.0812729	0.00897504	0.113779		0.276075		0.126728		0.752882		0.000212738	***	0.103225		0.66521		0.012554	*
PG(36:3)	0.197146	0.0122068	0.657745	0.0920336	0.201892	0.0142442	0.639254	0.0453316	0.123387	0.0106325	0.469048	0.063058	0.210914	0.0271967	0.448277	0.0532931	5.78724e-05	***	1.5382e-08	***	0.801759		0.858622		0.000187776	***	0.120402		0.777702		0.0122361	*
PG(36:2)	0.19519	0.0161633	1.46502	0.197167	0.193519	0.00860928	1.32282	0.10074	0.128857	0.0108796	1.07953	0.153956	0.190499	0.0213752	0.934736	0.109031	1.85414e-06	***	6.05716e-10	***	0.930018		0.527342		0.0030974	**	0.150836		0.90038		0.0158359	*
PG(36:1)	0.0156892	0.0015953	0.106974	0.0129224	0.0177967	0.00131088	0.127202	0.0090139	0.0122578	0.000833871	0.0737624	0.00917097	0.0171115	0.00190556	0.0958373	0.0079891	4.9084e-07	***	1.59764e-10	***	0.324085		0.212533		0.0777058		0.0574561		0.773939		0.0161999	*
PG(38:7)	0.00328832	0.00063159	0.00483652	0.00352531	0.00742097	0.0023032	0.00336051	0.000670746	0.00305241	0.000881482	0.0012275	0.0004912	0.00625922	0.000564629	0.00261977	0.000586405	0.669743		0.0933059		0.0864475		0.684825		0.827718		0.366207		0.615431		0.41467
PG(38:6)	0.0118896	0.000867402	0.0224227	0.00295682	0.018898	0.00142623	0.0291859	0.00238566	0.00854628	0.000732735	0.0136074	0.00138451	0.018485	0.00123447	0.0199728	0.0022743	0.00246163	**	0.0016169	**	0.000332185	***	0.0888702		0.00824881	**	0.020001	*	0.828055		0.0105492	*
PG(38:5)	0.0132444	0.000704405	0.0781203	0.00904776	0.0183792	0.00103102	0.083546	0.00586872	0.00869695	0.000675867	0.043512	0.00506341	0.0172319	0.00146096	0.0553611	0.00653737	3.62492e-07	***	8.52272e-10	***	0.000429009	***	0.619889		0.00014068	***	0.00496368	**	0.534962		0.00405263	**
PG(38:4)	0.00671168	0.00046166	0.0426424	0.00550836	0.00844053	0.000534071	0.040494	0.00261143	0.00586653	0.000370488	0.0272174	0.00314202	0.00919186	0.000630604	0.0294209	0.00238935	1.54069e-06	***	1.51752e-10	***	0.0226304	*	0.727872		0.17285		0.0321434	*	0.377977		0.00488946	**
PG(38:3)	0.00164694	0.000214134	0.0227685	0.00320857	0.00173098	0.000378848	0.0213758	0.00161701	0.00188462	0.000228349	0.0162871	0.00217026	0.00313792	0.00038297	0.0160522	0.00150444	1.3202e-06	***	2.01308e-10	***	0.845412		0.702029		0.455721		0.124548		0.0165222	*	0.0247386	*
PG(38:2)	0.00113136	0.000181656	0.0219056	0.00334606	0.00107511	0.000219128	0.018345	0.00143265	0.00156675	0.000162464	0.0174984	0.00233416	0.00251142	0.000355222	0.0151769	0.00138836	3.06807e-06	***	1.84091e-10	***	0.844242		0.3386		0.0905604		0.311854		0.00291837	**	0.12655
PG(40:8)	0.0249749	0.00308381	0.0102386	0.00171959	0.0392155	0.00370438	0.0202834	0.00193498	0.0194141	0.00299802	0.008052	0.00102702	0.0474593	0.00383385	0.0144812	0.00208188	0.000394869	***	0.000139744	***	0.0072516	**	0.000807235	***	0.211511		0.312212		0.138274		0.0533859
PG(40:7)	0.0358642	0.00297113	0.0488238	0.00564617	0.0494626	0.00339103	0.0741649	0.00662742	0.0282666	0.00382844	0.0355525	0.00438108	0.0577953	0.00455922	0.0536877	0.00760797	0.0544867		0.00404296	**	0.00639333	**	0.00810517	**	0.12845		0.0870956		0.163265		0.054676
PG(40:6)	0.00656622	0.00060421	0.0308827	0.00385342	0.00902757	0.000593488	0.0262511	0.00166868	0.00611533	0.000724505	0.0187849	0.00198376	0.00978045	0.00059172	0.0206753	0.00189417	2.8317e-06	***	5.86394e-09	***	0.00860198	**	0.281962		0.635527		0.0161667	*	0.380049		0.0379067	*
PG(40:5)	0.00014447	5.42743e-05	0.0085013	0.00155853	0.000309502	7.83703e-05	0.00847392	0.000715007	0.000252906	6.05097e-05	0.00526394	0.000754749	0.0008906	0.00020368	0.006475	0.00068122	2.22017e-05	***	4.5076e-10	***	0.0936527		0.987407		0.195206		0.0948541		0.0177682	*	0.055272
PG(42:10)	0.000274279	0.000165326	4.45642e-05	2.55435e-05	0.0018056	0.000363161	0.00123559	0.000458777	0.000325822	0.000128827	2.46135e-05	1.88461e-05	0.0029702	0.00050506	0.000866767	0.000366293	0.183533		0.346871		0.000732482	***	0.0166345	*	0.810554		0.551086		0.0796477		0.536305
PG(44:12)	0.00128844	0.000815253	0	0	0.00432567	0.000934995	0.000130473	7.32208e-05	0.00163483	0.000740951	6.85154e-06	6.85154e-06	0.00894814	0.00169148	0.000141171	9.54153e-05	0.128284		0.000128209	***	0.0227061	*	0.0885738		0.757771		0.283987		0.0297802	*	0.92993
PG*	0.873816	0.0390688	3.38567	0.41992	0.927823	0.0442496	3.20123	0.208316	0.656858	0.0314631	2.51366	0.3125	0.979572	0.0747039	2.3665	0.232051	5.40001e-06	***	1.28291e-09	***	0.368883		0.697758		0.000336404	***	0.123416		0.566597		0.0137762	*
LPA(18:1)	0.0072644	0.000595217	0.00956878	0.000913499	0.00587511	0.000462581	0.00685744	0.000678804	0.00427913	0.00034997	0.00486396	0.000312002	0.00293462	0.000166144	0.0033816	0.000245893	0.0461289		0.25348		0.0831987		0.0262731	*	0.000381575	***	0.000215569	***	3.83709e-06	***	8.26578e-05	***
LPA(18:0)	0.00394374	0.000972411	0.00442863	0.000655025	0.00385184	0.00102099	0.00615166	0.00128201	0.00191926	0.000228496	0.00288181	0.000428869	0.00264717	0.000524951	0.00204472	0.000483929	0.68319		0.180149		0.948641		0.24411		0.0652763		0.0735545		0.294089		0.00663923	**
LPA	0.0112081	0.00132036	0.0139974	0.00140488	0.00972695	0.00108236	0.0130091	0.00182793	0.0061984	0.000521927	0.00774577	0.000713988	0.0055818	0.000657412	0.00542632	0.000670553	0.162066		0.146114		0.400458		0.67232		0.00263379	**	0.00132075	**	0.00312387	**	0.000779775	***
																		***		***		***		***		***		***		***		***
																		***		***		***		***		***		***		***		***
PA(34:2)	0.0315827	0.00416973	0.0286465	0.00289915	0.0178557	0.00186019	0.0193723	0.00172036	0.0198508	0.00215534	0.0214965	0.00190161	0.0163675	0.000904226	0.0152823	0.00164174	0.569029		0.555275		0.0083099	**	0.0116589	*	0.0240809	*	0.0626681		0.467974		0.099492
PA(34:1)	0.0118479	0.00198484	0.0309078	0.00571534	0.00827471	0.00122924	0.0163425	0.00183896	0.0126383	0.00217855	0.0226991	0.00258279	0.0113486	0.00145011	0.0228338	0.00380726	0.00464431	**	0.00177171	**	0.149153		0.0239185	*	0.790729		0.23543		0.124114		0.138976
PA(36:4)	0.00731941	0.00118156	0.00394499	0.000367004	0.00524148	0.000450136	0.00419244	0.000478268	0.0072576	0.000829554	0.00595108	0.000848532	0.00875852	0.000534046	0.0085326	0.00102592	0.0122981	*	0.126844		0.127413		0.685432		0.966831		0.0319658	*	6.17582e-05	***	0.000902665	***
PA(36:3)	0.038548	0.00434527	0.0301209	0.0030734	0.0250882	0.00277082	0.025133	0.00181611	0.0263514	0.00269749	0.023517	0.00231123	0.0242466	0.00220185	0.0175747	0.00120784	0.127615		0.989157		0.0183218	*	0.176284		0.0296468	*	0.112617		0.812812		0.00219906	**
PA(36:2)	0.0470418	0.0043977	0.0632999	0.00574249	0.0341131	0.00260435	0.045904	0.00355097	0.0294076	0.00234623	0.0429519	0.00314553	0.0303928	0.00170741	0.032656	0.0020392	0.0349456	*	0.0154298	*	0.0221116	*	0.0172167	*	0.00242879	**	0.00818723	**	0.238038		0.00380208	**
PA(36:1)	0.00486453	0.00134326	0.0111344	0.00190577	0.00426229	0.000617277	0.00640988	0.000695603	0.00486459	0.00117385	0.00899239	0.00111571	0.00656083	0.000894394	0.00968587	0.00117695	0.0134018	*	0.032317	*	0.696786		0.0294546	*	0.999973		0.368562		0.050193		0.0255022	*
PA(38:5)	0.00662838	0.0020736	0.00542059	0.00075031	0.00358592	0.000774035	0.00667618	0.00131877	0.00537405	0.00193941	0.00304313	0.000849238	0.00509467	0.00100563	0.00428082	0.00128444	0.589406		0.0617252		0.198736		0.416825		0.664729		0.0481781		0.253937		0.20666
PA	0.147833	0.0169574	0.173475	0.016629	0.0984214	0.00865106	0.12403	0.00866112	0.105744	0.0117961	0.128651	0.0114592	0.10277	0.00626666	0.110846	0.0100525	0.291985		0.0491926		0.0197276	*	0.0150511	*	0.0583599		0.0457935		0.684434		0.331222
CL(66:5)	0.0205399	0.00316208	0.00198525	0.000549058	0.00635579	0.000992681	0.000856857	0.000268641	0.0148072	0.00169674	0.0048873	0.000573977	0.0064279	0.00123273	0.00182948	0.000238383	8.13434e-06	***	1.62105e-05	***	0.000487253	***	0.0783876		0.134716		0.00163974	**	0.964505		0.0128441	*
CL(66:4)	0.0284823	0.00268042	0.00755721	0.00121368	0.0147706	0.00128957	0.00539869	0.000696662	0.0208543	0.00249059	0.0112749	0.000876157	0.0137512	0.00116728	0.00619415	0.000730696	3.93242e-07	***	1.7455e-06	***	0.000208507	***	0.137228		0.0505924		0.0266964	*	0.563101		0.439161
CL(66:3)	0.0264435	0.00201996	0.0131899	0.00172575	0.0174744	0.00173481	0.0115623	0.00101672	0.0204927	0.00254121	0.0171492	0.00103609	0.0157371	0.000845303	0.0112188	0.0013807	5.41588e-05	***	0.00679436	**	0.00311315	**	0.425181		0.0786545		0.0763835		0.3656		0.843061
CL(66:2)	0.0114806	0.00113664	0.00998259	0.00136237	0.0094228	0.00125375	0.00844878	0.000724354	0.00873828	0.00126515	0.0126147	0.000778494	0.00799558	0.000594224	0.00845416	0.00105959	0.407579		0.499518		0.236349		0.330997		0.120778		0.127879		0.302289		0.996697
CL(68:6)	0.120763	0.0126167	0.0286251	0.00279749	0.05183	0.0049601	0.0210775	0.00165028	0.0901903	0.00761429	0.0355365	0.00281134	0.0497078	0.00585189	0.0224444	0.00116252	3.77923e-07	***	4.74347e-06	***	7.34795e-05	***	0.0297687	*	0.0554292		0.0993261		0.786707		0.505363
CL(68:5)	0.150912	0.011823	0.0526693	0.00485761	0.0805504	0.00679986	0.0404705	0.00269397	0.111421	0.0111728	0.0635467	0.00416352	0.0761544	0.00514088	0.0379415	0.00309466	1.14017e-07	***	1.28568e-05	***	5.52093e-05	***	0.0389158	*	0.0248497	*	0.112181		0.607701		0.543975
CL(68:4)	0.162434	0.00970497	0.0930275	0.00767741	0.130772	0.00909497	0.0803843	0.00443972	0.121912	0.0136272	0.107386	0.00577688	0.136556	0.00797313	0.072499	0.00782008	1.22319e-05	***	4.58257e-05	***	0.0275141	*	0.168018		0.022939	*	0.164185		0.636125		0.390029
CL(68:3)	0.128285	0.00771404	0.136712	0.0108531	0.133708	0.0110504	0.130485	0.00572443	0.0957191	0.0106486	0.146064	0.0069107	0.14256	0.00925198	0.11942	0.0127362	0.533335		0.793179		0.687385		0.616829		0.0204415	*	0.49605		0.543256		0.43659
CL(68:2)	0.0439771	0.00299987	0.10086	0.00845919	0.0528771	0.00512272	0.0979439	0.00511735	0.0332462	0.00292016	0.0935693	0.00437956	0.0536688	0.003577	0.0864259	0.00875553	2.23239e-06	***	3.66714e-06	***	0.140775		0.770802		0.0184403	*	0.479592		0.898988		0.268285
CL(70:8)	0.0179117	0.00167638	0.00200929	0.000321656	0.0104799	0.000830891	0.00190965	0.000208348	0.0171636	0.000543424	0.00366714	0.000379689	0.0109183	0.000942367	0.00299072	0.000199354	4.30969e-09	***	9.52613e-10	***	0.000908749	***	0.797291		0.68674		0.00314904	**	0.732601		0.00111014	**
CL(70:7)	0.516344	0.029336	0.201909	0.012743	0.305254	0.0230016	0.16509	0.0106885	0.421895	0.0309333	0.235179	0.0116252	0.299204	0.0200578	0.155735	0.00943432	1.64473e-09	***	1.21464e-05	***	1.50621e-05	***	0.0375201	*	0.0378383	*	0.0725263		0.844112		0.518551
CL(70:6)	0.573603	0.0302997	0.317043	0.0213757	0.437564	0.0169504	0.285412	0.0111822	0.448423	0.0417384	0.35676	0.0183452	0.454644	0.0166362	0.258668	0.023861	6.01546e-07	***	1.79769e-07	***	0.000996469	***	0.20331		0.0227892	*	0.183381		0.480456		0.321182
CL(70:5)	0.403332	0.0202287	0.381546	0.0273636	0.385664	0.0180511	0.376021	0.0114151	0.308904	0.0297297	0.403869	0.0177769	0.406273	0.0183332	0.33829	0.0337702	0.528647		0.650462		0.52461		0.853862		0.0144691	*	0.520864		0.433316		0.301332
CL(70:4)	0.180978	0.00997964	0.308661	0.0221551	0.184814	0.0120323	0.300063	0.0104718	0.132818	0.0120248	0.309952	0.0123566	0.190607	0.010836	0.26494	0.0267244	2.84994e-05	***	3.79135e-07	***	0.807327		0.729028		0.00539911	**	0.9621		0.723325		0.234018
CL(70:3)	0.0350301	0.00228807	0.123596	0.00998999	0.0393152	0.00362357	0.115088	0.0056949	0.0240054	0.0024335	0.113991	0.00455268	0.0393515	0.00309306	0.0964844	0.0105432	1.60211e-08	***	3.59674e-10	***	0.320262		0.467217		0.00338362	**	0.422976		0.993963		0.134805
CL(72:9)	0.0556917	0.00340957	0.0207818	0.000486328	0.0620908	0.0020171	0.0247755	0.000661859	0.05644	0.00265776	0.0219644	0.00067119	0.061476	0.00243232	0.0256445	0.000862998	9.43227e-10	***	2.39125e-14	***	0.129521		7.354e-05	***	0.865963		0.160341		0.849157		0.432824
CL(72:8)	1.2355	0.0395986	1.14689	0.0356912	1.61554	0.0483562	1.35145	0.0437071	1.29528	0.0389477	1.1541	0.0241635	1.6847	0.0622365	1.38359	0.0436576	0.110642		0.000559968	***	4.47136e-06	***	0.00149757	**	0.295303		0.874295		0.396217		0.608113
CL(72:7)	1.14475	0.0383126	1.24736	0.0656381	1.36106	0.0400562	1.47153	0.0497342	1.08162	0.0702777	1.37411	0.0443301	1.46292	0.0398573	1.47102	0.102456	0.190718		0.102008		0.000819599	***	0.0124439	*	0.428561		0.140898		0.0863431		0.996433
CL(72:6)	0.438773	0.0171385	0.728468	0.0429281	0.448439	0.0129065	0.792104	0.0240001	0.377227	0.0251315	0.813545	0.0331772	0.487211	0.0177235	0.784517	0.0688278	2.62358e-06	***	4.73618e-11	***	0.661536		0.209121		0.0526716		0.144471		0.0963521		0.918054
CL(72:5)	0.0885769	0.00529754	0.25713	0.0173807	0.0845482	0.00423526	0.251	0.00763669	0.0635263	0.00572789	0.255805	0.010037	0.0870159	0.00504429	0.212835	0.0212365	4.6501e-09	***	1.62452e-14	***	0.56348		0.749834		0.00414837	**	0.950761		0.714349		0.104935
CL(72:4)	0.0151708	0.000852222	0.0594085	0.00448436	0.0216268	0.00136586	0.0603609	0.00221118	0.010653	0.00116411	0.0559938	0.00192304	0.0198961	0.00115832	0.0465003	0.00505927	2.12868e-09	***	1.85766e-12	***	0.000530762	***	0.850672		0.00462307	**	0.521479		0.342244		0.0199112	*
CL(74:10)	0.0515177	0.002084	0.0592775	0.00287287	0.0666308	0.00184755	0.0737879	0.00285128	0.0586648	0.00362074	0.0536409	0.00235034	0.0706284	0.00333068	0.0814844	0.00434719	0.0397118	*	0.0515498		2.42051e-05	***	0.00165034	**	0.0951114		0.154983		0.317871		0.152936
CL(74:9)	0.0807606	0.00275307	0.129703	0.0098717	0.0806841	0.00310215	0.13411	0.00602367	0.0851441	0.00475644	0.114458	0.00497158	0.0887571	0.00325375	0.156163	0.0125065	9.08387e-05	***	1.60846e-07	***	0.985418		0.706811		0.424384		0.209639		0.0881592		0.126407
CL(74:8)	0.0511696	0.00169464	0.107376	0.00394099	0.0605281	0.00170615	0.120181	0.0052461	0.0583075	0.00523155	0.0973319	0.00233342	0.0672483	0.00302415	0.132266	0.00678019	7.22476e-12	***	9.44679e-10	***	0.000854575	***	0.0638403		0.192673		0.0504495		0.0729602		0.172605
CL(74:7)	0.0230827	0.000960082	0.0657444	0.00270733	0.031344	0.0010797	0.0740721	0.0035562	0.0301582	0.0040519	0.0573961	0.00109397	0.0339707	0.00212563	0.0769951	0.00360369	5.99879e-13	***	3.20759e-10	***	1.0761e-05	***	0.0758325		0.091385		0.0150627	*	0.296226		0.569583
CL(74:6)	0.00546953	0.000252629	0.0222156	0.00159401	0.00917256	0.000534651	0.025213	0.0012836	0.00758994	0.000849938	0.019563	0.000714794	0.0101747	0.000849148	0.0232423	0.00157767	6.14025e-10	***	2.73754e-10	***	2.21579e-06	***	0.157171		0.0215517	*	0.171395		0.339338		0.343111
CL(76:12)	0.0250075	0.00746257	0.0269153	0.00946569	0.0272119	0.00432703	0.0183435	0.00385947	0.0600535	0.0176189	0.0189149	0.00557538	0.0369163	0.00806224	0.0468354	0.0183128	0.87568		0.139849		0.805423		0.410745		0.0728252		0.497525		0.313418		0.142152
CL(76:11)	0.0218067	0.00511716	0.0267916	0.00717229	0.0199049	0.00258643	0.0191768	0.00282303	0.0445811	0.0116446	0.0232076	0.0051383	0.0262257	0.00441319	0.0383257	0.0114999	0.57726		0.85187		0.750303		0.333928		0.079249		0.699938		0.240958		0.120103
CL(76:10)	0.00952234	0.0015784	0.0161149	0.00322286	0.00877133	0.000646381	0.0130142	0.00119282	0.0170527	0.00371182	0.0128579	0.00172406	0.0111254	0.00108306	0.0203986	0.00453649	0.079748		0.00613274	**	0.674543		0.376695		0.0678873		0.410635		0.0824468		0.129698
CL(76:9)	0.00155949	0.000437097	0.00535969	0.00101346	0.00147892	0.000220411	0.00485627	0.000603387	0.00520522	0.00160447	0.00473061	0.000672202	0.00318991	0.000435592	0.00953162	0.00200207	0.00231939	**	5.0367e-05	***	0.874409		0.673658		0.0332228	*	0.626042		0.00265185	**	0.0358234	*
CL(76:8)	0.000360481	9.99954e-05	0.00163085	0.000236518	0.000651596	0.00014325	0.00253389	0.000378964	0.001492	0.000475285	0.00169519	0.000240992	0.00115593	0.000174939	0.00457601	0.000814854	5.98809e-05	***	0.000203066	***	0.105863		0.0555566		0.0242396	*	0.851819		0.0386256	*	0.0331857	*
CL	5.66924	0.172207	5.70053	0.220272	5.76054	0.14021	6.07672	0.147497	5.12359	0.237881	5.99475	0.140086	6.05617	0.131466	5.99746	0.291861	0.911891		0.136786		0.688417		0.169891		0.0738751		0.295147		0.138594		0.81072
LCL(52:5)	0.0274967	0.00208636	0.00657325	0.000914214	0.0235057	0.00241259	0.00918174	0.000943014	0.0234971	0.00353379	0.00972998	0.000490091	0.0125099	0.00149683	0.0057317	0.000757977	5.53303e-09	***	1.13738e-05	***	0.222542		0.0596288		0.331173		0.00945799	**	0.000739748	***	0.00927935	**
LCL(52:4)	0.0244215	0.0018385	0.0113104	0.00141713	0.0289311	0.0017932	0.0159041	0.000880824	0.0202686	0.00325108	0.0135338	0.000773938	0.0170861	0.00196383	0.0106679	0.00127251	1.11399e-05	***	1.25815e-06	***	0.0946338		0.0116051	*	0.268485		0.208304		0.000234051	***	0.00267551	**
LCL(52:3)	0.0134604	0.00121421	0.0119039	0.00155807	0.0198155	0.00109139	0.0176707	0.000935854	0.0103553	0.00185765	0.0125956	0.000690596	0.011411	0.00137622	0.0114967	0.00153409	0.439122		0.148667		0.000893997	***	0.00440434	**	0.169541		0.708674		0.000114535	***	0.00236115	**
LCL(52:2)	0.00184972	0.000316018	0.00452466	0.00072306	0.00394971	0.000356048	0.00687128	0.000670411	0.00165552	0.000374448	0.00469962	0.000354158	0.00220639	0.000337947	0.00500054	0.000706782	0.00263437	**	0.00118783	**	0.000234426	***	0.0264139	*	0.694197		0.840467		0.00188279	**	0.0678697
LCL(54:7)	0.00115726	0.000237463	3.44944e-05	1.77715e-05	0.00362264	0.000526152	0.000327822	6.31305e-05	0.00190482	0.000595115	0.000136714	2.70759e-05	0.00159306	0.000308744	0.000219883	3.39086e-05	0.000105279	***	1.93897e-06	***	0.000251661	***	0.000190211	***	0.241687		0.00397626	**	0.00272041	**	0.146227
LCL(54:6)	0.0812221	0.00639888	0.056408	0.00440118	0.15848	0.0137979	0.0988454	0.00404484	0.0817699	0.0112443	0.0593424	0.00374378	0.088665	0.0104058	0.0696624	0.00597846	0.00418016	**	0.000311577	***	3.52777e-05	***	4.03853e-07	***	0.965896		0.625307		0.000532634	***	0.000543163	***
LCL(54:5)	0.053216	0.0038581	0.0497722	0.00444336	0.0890478	0.00666995	0.0820898	0.0031489	0.0477742	0.0068314	0.0522216	0.00287761	0.0491762	0.00504386	0.0549851	0.00585304	0.56435		0.343129		0.000108402	***	5.6829e-06	***	0.486071		0.663278		9.20888e-05	***	0.000498491	***
LCL(54:4)	0.0197415	0.0014952	0.0257091	0.00288302	0.031251	0.00200755	0.039277	0.0018747	0.0158923	0.00220772	0.0264027	0.00158566	0.0177488	0.00161473	0.0263894	0.00315221	0.0796806		0.00808721	**	0.000137555	***	0.000689004	***	0.157547		0.844168		3.0879e-05	***	0.00195747	**
LCL(54:3)	0.00360104	0.000586316	0.00649908	0.00112448	0.00622545	0.000482487	0.0118695	0.000734101	0.00269958	0.000559413	0.00794769	0.000584932	0.0039401	0.000511225	0.00786851	0.00104976	0.0322996	*	3.01509e-06	***	0.00257627	**	0.000604399	***	0.280461		0.294704		0.00395693	**	0.00494669	**
LCL(54:2)	4.88077e-05	1.89061e-05	0.000119531	5.55377e-05	0.000223775	8.04507e-05	0.0006666	0.000158506	4.32979e-05	2.57693e-05	0.000216456	3.95885e-05	0.000156584	4.35935e-05	0.000694324	0.000170589	0.240817		0.0245605	*	0.0387716	*	0.00360972	**	0.863184		0.186706		0.460546		0.906312
LCL(56:8)	0.000854081	0.000244031	0.000432792	7.45142e-05	0.00428086	0.000552617	0.00287471	0.000416187	0.00145723	0.000351715	0.000792988	0.00014985	0.00220591	0.00042816	0.00239213	0.000360998	0.112919		0.0525814		8.44453e-06	***	8.24721e-06	***	0.167682		0.0346271	*	0.00687688	**	0.390529
LCL(56:7)	0.00172159	0.000275625	0.00181538	0.000273608	0.00374208	0.000430311	0.00539211	0.000546929	0.00206475	0.000471689	0.00253352	0.000179852	0.0021532	0.00032046	0.00434389	0.000486982	0.811397		0.0291506	*	0.000614584	***	6.94423e-06	***	0.528216		0.0489014		0.00690327	**	0.166371
LCL(56:6)	0.000463181	9.57847e-05	0.00146166	0.000273233	0.00235837	0.000381134	0.00451342	0.00055983	0.000828583	0.000190643	0.00165927	0.000175467	0.00117971	0.000265535	0.00353015	0.000481229	0.00228958	**	0.00512963	**	5.74191e-05	***	6.73182e-05	***	0.0933804		0.567813		0.0177233	*	0.196522
LCL(56:5)	7.29941e-05	2.5808e-05	0.000292321	5.83109e-05	0.000350466	6.17488e-05	0.00111075	0.000250464	0.000477365	0.000370058	0.000316968	3.76707e-05	0.000195334	4.55598e-05	0.000937429	0.000191588	0.00233973	**	0.0100366	*	0.000335312	***	0.00430555	**	0.266932		0.738115		0.0535662		0.588113
LCL	0.229327	0.0171653	0.176857	0.0165611	0.375785	0.027198	0.296595	0.0125394	0.210688	0.0308638	0.192129	0.0103882	0.210227	0.0227667	0.20392	0.0211574	0.0386209	*	0.0128161	*	0.000142037	***	8.4701e-06	***	0.595001		0.465271		0.000123195	***	0.00105984	**
SM(34:1:2)	0.520798	0.0435711	0.524271	0.0267633	0.639632	0.0368044	0.597611	0.0201115	0.610782	0.041884	0.528601	0.0345613	0.648032	0.0304228	0.611722	0.0222457	0.946459		0.31684		0.0516149		0.039356	*	0.152856		0.92086		0.861135		0.642599
SM(36:1:2)	0.191469	0.0357266	0.428609	0.0490676	0.235541	0.0167068	0.354806	0.0235852	0.372347	0.089014	0.431731	0.0342514	0.266451	0.0300626	0.497527	0.058154	0.00075645	***	0.000566265	***	0.29062		0.188969		0.0650212		0.96053		0.390845		0.0330548	*
SM(38:1:2)	0.0937759	0.0140891	0.0766876	0.0133307	0.13279	0.0148421	0.105137	0.0185806	0.107808	0.0147529	0.104675	0.0174056	0.17397	0.0168209	0.128056	0.0184302	0.387834		0.26345		0.0702689		0.226574		0.499025		0.209087		0.0827623		0.390618
SM(40:1:2)	0.538706	0.0294419	0.208841	0.0315434	0.489401	0.0376191	0.246298	0.0371479	0.529112	0.0546766	0.332189	0.0347046	0.571514	0.0232455	0.291807	0.029075	1.244e-07	***	0.000157982	***	0.309474		0.450289		0.875816		0.0160057	*	0.072353		0.345174
SM(41:1:2)	0.125844	0.0144579	0.072614	0.0132929	0.176644	0.0163831	0.0985392	0.0146499	0.148878	0.0281234	0.0964983	0.0106961	0.244986	0.0270765	0.103986	0.0153276	0.0127804	*	0.00182953	**	0.0296391	*	0.203526		0.463344		0.188808		0.0469172		0.799634
SM(42:2:2)	0.290183	0.0359222	0.272865	0.0336964	0.289594	0.0308966	0.353279	0.0440396	0.353422	0.0395237	0.324122	0.0231458	0.385154	0.0289744	0.340202	0.0366628	0.728466		0.257634		0.990283		0.161121		0.248538		0.243079		0.034701	*	0.821583
SM(42:1:2)	0.169772	0.0194392	0.120076	0.012406	0.223455	0.0124205	0.155039	0.0133744	0.191116	0.0210837	0.0982993	0.00714647	0.241577	0.0191547	0.151676	0.0157387	0.0423693	*	0.0012413	**	0.033203	*	0.0683728		0.464192		0.165045		0.445281		0.87215
SM	1.93055	0.145619	1.70396	0.125645	2.18706	0.119646	1.91071	0.138325	2.31347	0.137898	1.91611	0.0882598	2.53168	0.122341	2.12498	0.110815	0.251345		0.148958		0.192493		0.28052		0.0711345		0.199198		0.0576887		0.239528
Cer(36:1:2)	0.00570387	0.00245793	0.0107327	0.00384513	0.003116	0.00116198	0.00551578	0.00239323	0.0213706	0.00755471	0.010205	0.00403538	0.00944749	0.00467275	0.0112623	0.00211643	0.282392		0.390959		0.366134		0.261735		0.0536212		0.925812		0.220572		0.0858004
Cer(40:1:2)	0.0127621	0.00337482	0.0059182	0.000969109	0.00879257	0.003079	0.00650968	0.00223297	0.0202243	0.00319948	0.00772524	0.00115815	0.0121964	0.00164008	0.00801637	0.00269821	0.0641395		0.549923		0.397552		0.810267		0.125071		0.241673		0.328957		0.671238
Cer(41:1:2)	0.00802238	0.0036855	0.00419937	0.000926871	0.00429117	0.00120983	0.00572461	0.00229478	0.0115454	0.00205717	0.0057971	0.00103847	0.00651993	0.000882374	0.00729228	0.00240609	0.32536		0.596348		0.364625		0.544032		0.424868		0.263586		0.146829		0.641935
Cer(42:2:2)	0.0143167	0.00286903	0.00994885	0.00122147	0.00932166	0.00193792	0.0100772	0.00147368	0.0236203	0.00377105	0.0167261	0.00307632	0.016434	0.00303718	0.0181002	0.00236482	0.175235		0.756968		0.171423		0.947162		0.0605059		0.040887	*	0.0667636		0.00870833	**
Cer(42:1:2)	0.0135981	0.00313364	0.0125969	0.0022866	0.0139649	0.003504	0.0127855	0.00370603	0.0274489	0.00519015	0.0120504	0.00168899	0.013442	0.00132267	0.0120743	0.00309156	0.798731		0.820154		0.938348		0.965849		0.0298675	*	0.85471		0.886581		0.884194
Cer	0.0544032	0.0125559	0.0433961	0.00414918	0.0394863	0.00769542	0.0406127	0.0104569	0.10421	0.0132555	0.0525038	0.00772103	0.0580397	0.00855513	0.0567455	0.0100618	0.414139		0.932724		0.333115		0.806885		0.0125668	*	0.289324		0.1242		0.278262
DG(32:2)	0.121264	0.00994857	0.0223136	0.00717012	0.0993713	0.0169244	0.0173809	0.00364681	0.195928	0.0319161	0.0303137	0.00861667	0.0883185	0.00682621	0.0137432	0.00270505	5.11823e-08	***	6.98425e-05	***	0.267773		0.546039		0.0306664	*	0.479857		0.538526		0.431599
DG(32:1)	0.289289	0.0345685	0.209987	0.0402637	0.156525	0.0242672	0.210642	0.0328069	0.339503	0.0466032	0.242589	0.0362228	0.109604	0.0105839	0.173787	0.0227983	0.149286		0.205586		0.00555186	**	0.990056		0.391312		0.561208		0.0820796		0.366279
DG(34:3)	0.571262	0.0333845	0.0677503	0.0136776	0.3848	0.044231	0.0851933	0.0200904	0.718161	0.0735434	0.0707995	0.0168052	0.404086	0.0323417	0.0530042	0.00809961	2.07721e-12	***	2.70811e-06	***	0.00269325	**	0.480499		0.0751859		0.888288		0.725236		0.151471
DG(34:2)	3.02409	0.139395	1.43225	0.259893	2.70173	0.16009	1.48732	0.21313	3.19741	0.256458	1.63381	0.209677	2.59169	0.114434	1.20488	0.0959025	2.023e-05	***	0.00020118	***	0.142137		0.87137		0.549828		0.563929		0.57706		0.239701
DG(34:1)	2.47105	0.135878	3.18325	0.217444	2.11778	0.125858	3.07214	0.251753	2.24634	0.192096	3.08398	0.303723	1.70564	0.0711361	2.41288	0.162992	0.0109787	*	0.00344717	**	0.0716662		0.741541		0.344118		0.788491		0.00829094	**	0.0387512	*
DG(36:4)	1.00821	0.124386	0.0437377	0.0090719	1.2989	0.15634	0.0715399	0.0121563	1.24695	0.128805	0.0514896	0.00954177	1.39553	0.0871419	0.0518092	0.0111089	1.03163e-07	***	5.6657e-08	***	0.157137		0.0803833		0.196888		0.564101		0.586654		0.243607
DG(36:3)	4.06457	0.104424	2.15421	0.176459	4.29196	0.271971	2.23444	0.162685	3.81039	0.293703	2.16442	0.2086	3.97107	0.195441	1.72412	0.0917695	4.3038e-09	***	1.47484e-06	***	0.428875		0.741336		0.408107		0.970354		0.342874		0.0121669	*
DG(36:2)	3.43236	0.135173	5.0224	0.447012	3.42165	0.167	4.82313	0.358057	2.9867	0.294945	4.78713	0.410798	2.96244	0.103587	3.54113	0.174827	0.00254214	**	0.00244933	**	0.96043		0.731205		0.172167		0.707106		0.0268257	*	0.00396585	**
DG(36:1)	1.19252	0.0900593	1.97782	0.283259	1.14256	0.112089	1.97665	0.113459	0.754348	0.0970428	1.36979	0.14923	0.862019	0.085566	1.18226	0.0655997	0.0148879	*	3.60141e-05	***	0.729686		0.996968		0.00329768	**	0.0887019		0.0574806		4.22488e-06	***
DG	16.1746	0.362556	14.1137	1.16946	15.6153	0.813065	13.9784	1.05396	15.4957	1.23911	13.4343	1.21871	14.0904	0.593521	10.3576	0.538921	0.106472		0.238475		0.524643		0.932294		0.590735		0.693157		0.140149		0.00575278	**
TG(46:2)	2.47089	0.463447	2.36263	0.498493	0.880128	0.158334	1.20273	0.154907	2.74206	0.401366	2.58744	0.23634	0.983081	0.127161	1.26783	0.163482	0.875077		0.160472		0.0050479	**	0.0368795	*	0.665431		0.706657		0.614681		0.77524
TG(46:1)	3.8553	0.740938	5.00362	0.887239	1.81441	0.32779	3.01258	0.349207	3.97371	0.533757	5.34065	0.530649	1.41841	0.179423	2.87152	0.347802	0.331307		0.0212514	*	0.0236167	*	0.0485715		0.899685		0.76005		0.290429		0.777401
TG(48:3)	8.74763	1.29173	6.55648	1.07632	3.34365	0.423005	3.25393	0.382041	9.01364	1.22519	6.39825	0.52043	3.33846	0.370171	2.89029	0.34932	0.205987		0.876102		0.000974756	***	0.00846658	**	0.883162		0.902463		0.992692		0.489767
TG(48:2)	23.9108	4.16542	23.9061	4.06611	11.0664	1.64308	13.1476	1.54727	24.6888	3.05182	24.297	2.25034	10.5784	1.14436	11.9853	1.48135	0.999371		0.366574		0.0114183	*	0.0216056	*	0.883474		0.93744		0.807184		0.592859
TG(48:1)	17.8889	3.36658	25.7566	3.67133	10.3527	1.83872	18.5634	2.3287	20.002	2.56844	31.2471	3.56954	8.5267	1.02937	17.5551	2.1453	0.128497		0.0124591	*	0.0693137		0.112218		0.62771		0.301705		0.385574		0.753129
TG(48:0)	0.868127	0.135014	0.990997	0.193923	2.10483	0.39514	1.4267	0.203385	2.16522	0.250336	1.69892	0.211003	1.47426	0.138667	2.18429	0.157746	0.608267		0.132581		0.00583509	**	0.1353		0.000131254	***	0.0227008	*	0.133904		0.00751714	**
TG(50:5)	1.98293	0.202867	0.872077	0.10088	0.973461	0.0622782	0.482069	0.0545738	2.16676	0.271511	0.787637	0.0547888	1.1347	0.117179	0.394741	0.043367	6.6646e-05	***	6.49847e-06	***	0.000163085	***	0.00256909	**	0.589191		0.495472		0.250041		0.223432
TG(50:4)	19.724	2.29735	9.54752	1.3807	8.66511	0.708619	5.08133	0.58033	20.651	2.45038	9.17332	0.709421	9.67027	0.929168	4.21337	0.500147	0.000988917	***	0.000749004	***	0.000233772	***	0.00687491	**	0.785061		0.822871		0.405815		0.269435
TG(50:3)	71.6513	10.4393	58.055	8.61985	32.621	3.56061	31.9311	3.80183	71.6629	8.68059	58.0373	5.03715	32.8614	3.38737	27.372	3.32273	0.326155		0.896412		0.00262916	**	0.0110961	*	0.999335		0.998673		0.961439		0.376339
TG(50:2)	101.743	16.8644	132.415	18.4652	61.1899	7.56143	85.5115	10.4928	109.974	12.2698	144.277	15.4137	57.7908	6.05874	75.5049	9.04855	0.232971		0.0783793		0.0454845		0.0379369	*	0.701553		0.635843		0.72714		0.477769
TG(50:1)	35.692	5.33522	62.2013	7.24427	33.606	4.6735	64.7306	8.91442	45.9447	5.29652	90.5083	11.9827	26.7439	2.75429	62.1428	6.98528	0.00746268	**	0.00667748	**	0.773319		0.827755		0.188054		0.0487643		0.210664		0.821368
TG(52:6)	2.91764	0.27729	0.995994	0.0979954	1.71542	0.119801	0.748749	0.0642329	3.15528	0.349877	0.870079	0.0672424	1.95683	0.206856	0.577196	0.0472003	1.42652e-06	***	3.58795e-07	***	0.0009208	***	0.0464497		0.597015		0.321621		0.335435		0.0426142	*
TG(52:5)	30.5701	3.02095	9.54996	1.10679	15.5086	0.989197	5.93086	0.635573	32.4219	3.36354	9.28206	0.767451	18.2303	1.813	4.76159	0.514806	1.42858e-06	***	4.65143e-08	***	0.000168602	***	0.00962335	**	0.685383		0.850481		0.213122		0.166887
TG(52:4)	137.112	13.7661	75.3547	8.69408	76.7079	4.38424	46.265	5.12235	141.138	13.9566	76.5704	6.48825	89.1436	7.77724	37.6905	4.27244	0.000997712	***	0.000208751	***	0.000610451	***	0.00864004	**	0.839481		0.914899		0.188705		0.211992
TG(52:3)	251.548	33.2328	284.776	32.5528	150.179	11.4278	183.497	20.8132	250.487	27.6598	301.719	28.0694	167.645	13.8918	154.864	18.0092	0.482568		0.185935		0.0112005	*	0.0155936	*	0.980857		0.703977		0.347644		0.309482
TG(52:2)	174.163	33.4516	399.11	39.0561	113.069	14.4944	290.705	35.1718	190.438	25.8117	453.413	48.0669	126.61	11.433	251.287	29.49	0.000241753	***	0.000188853	***	0.119553		0.0511594		0.707715		0.385857		0.46755		0.399714
TG(52:1)	3.28187	0.921251	6.82667	2.40192	14.545	2.06648	18.0689	3.38201	10.283	1.1409	4.60663	1.70224	9.79513	0.872079	15.3277	2.82346	0.182076		0.394401		4.44896e-05	***	0.0127831	*	9.3719e-05	***	0.476726		0.0404568	*	0.540208
TG(54:7)	3.90341	0.39581	0.942895	0.0825725	2.79301	0.236453	0.92602	0.092624	4.48831	0.415755	0.817564	0.0503862	3.61175	0.39818	0.701333	0.0595242	2.48583e-07	***	1.87432e-07	***	0.0284214	*	0.893069		0.319716		0.232144		0.0987946		0.0534561
TG(54:6)	31.2032	2.98228	7.01402	0.539839	21.9628	1.92895	5.51141	0.507767	33.7493	2.9627	6.67651	0.512367	28.9264	2.2245	4.60459	0.46523	6.13736e-08	***	2.64523e-08	***	0.0186668	*	0.0548946		0.552126		0.659426		0.0289099	*	0.20147
TG(54:5)	127.356	10.0238	53.3909	3.70101	89.4471	5.74767	42.0837	3.51109	120.316	12.0924	55.611	3.51744	103.483	6.77513	33.4429	2.81314	5.97204e-07	***	4.56452e-07	***	0.00428736	**	0.0373092	*	0.656509		0.672496		0.132503		0.0678388
TG(54:4)	239.489	18.119	228.805	18.0117	162.495	8.19556	160.406	15.1797	230.618	29.7162	249.73	19.7598	192.959	12.4461	130.964	14.792	0.679877		0.907213		0.00117081	**	0.00823315	**	0.797509		0.442967		0.0580786		0.178709
TG(54:3)	175.23	20.9525	436.894	38.9723	126.194	6.82739	307.969	31.8387	180.746	27.7168	484.871	45.9884	152.694	9.72385	252.501	29.4861	5.96259e-06	***	2.61251e-05	***	0.0439429	*	0.0177815	*	0.874058		0.432233		0.0397569	*	0.214496
TG(54:2)	22.6269	3.21041	103.863	7.97923	27.7793	2.51254	107.738	12.4027	26.2141	3.1297	173.17	25.8764	24.1709	1.64212	108.852	14.0375	3.37598e-09	***	5.19014e-06	***	0.225838		0.795165		0.434039		0.0120119	*	0.235141		0.953115
TG(54:1)	0.499732	0.185958	0.530749	0.396102	3.78104	0.755981	2.78247	0.682245	2.12653	0.369665	0.479202	0.163716	2.02065	0.227488	4.45382	0.520353	0.944132		0.336675		0.000257642	***	0.00922222	**	0.000598454	***	0.911967		0.0308224	*	0.0643017
TG(56:8)	1.60086	0.16536	0.683968	0.0751405	1.95955	0.243817	0.781712	0.109067	1.65476	0.19235	0.452305	0.0631735	2.28583	0.204418	0.5659	0.0754025	4.68927e-05	***	0.000178418	***	0.230084		0.468319		0.832973		0.0321888	*	0.313953		0.117846
TG(56:7)	4.31083	0.330761	4.11705	0.257746	4.84892	0.514384	4.42654	0.36795	4.15135	0.474433	3.35866	0.187184	5.42971	0.396007	3.40949	0.316408	0.648531		0.506079		0.380835		0.498078		0.782494		0.0327501	*	0.376525		0.0478271
TG(56:6)	5.41425	0.295127	8.89501	0.544517	4.93396	0.476835	7.57678	0.55112	5.37069	0.597906	7.39658	0.411119	5.87999	0.370946	5.99404	0.528963	1.19111e-05	***	0.00170035	**	0.392725		0.102941		0.94715		0.0464345		0.128914		0.0501975
TG(56:5)	9.88346	0.779249	12.5664	0.602033	6.89961	0.561105	9.86369	0.69297	9.54355	0.778242	12.0186	0.708645	7.8033	0.3603	8.01698	0.585453	0.0123763	*	0.00351695	**	0.00598008	**	0.00750184	**	0.761107		0.559716		0.182445		0.0540018
TG(56:4)	14.6321	0.930357	17.6674	0.931969	8.87617	0.455386	12.4532	0.894222	15.7693	1.42644	20.6765	1.48006	11.4592	0.335948	11.3968	1.10216	0.0309864	*	0.00230969	**	2.3598e-05	***	0.000551151	***	0.504556		0.0902917		0.000148469	***	0.464536
TG(56:3)	11.9622	0.920074	22.0793	1.12189	8.88545	0.402237	16.3347	1.31688	13.1354	1.43177	28.816	2.58278	9.87863	0.207661	15.4475	1.67326	5.33809e-07	***	3.6858e-05	***	0.00734357	**	0.00310639	**	0.490776		0.0194299	*	0.0353195	*	0.680974
TG(56:2)	3.45062	0.352984	6.2054	0.498191	4.1825	0.403151	6.78889	0.554132	4.38439	0.581993	8.7076	1.02734	3.6434	0.170563	6.5242	0.766798	0.000172805	***	0.00119651	**	0.184726		0.441952		0.176464		0.0315356	*	0.217991		0.782266
TG	1539.69	172.178	2007.93	187.199	1013.38	59.7853	1459.2	155.003	1593.18	177.565	2273.59	219.305	1122.15	83.2437	1259.77	138.566	0.0791444		0.0169996	*	0.0111134	*	0.034221	*	0.830976		0.364844		0.308308		0.347858
FFA(14:0)	2.03487	0.249972	3.65821	0.752159	3.37279	0.612724	2.66298	0.682751	0.888092	0.123635	1.29369	0.524966	0.585258	0.0459453	0.809188	0.102003	0.0526715		0.450774		0.0492928		0.337872		0.000657056	***	0.022344	*	0.000109408	***	0.0135146	*
FFA(16:1)	3.78562	0.603059	2.62787	0.554716	2.59753	0.176521	2.09856	0.161433	2.77614	0.30371	1.42789	0.266121	1.7157	0.124323	1.72097	0.104331	0.171661		0.0489391		0.0832488		0.369502		0.160927		0.082452		0.000464806	***	0.0622317
FFA(16:0)	20.8562	3.38343	36.0283	8.60813	29.4383	7.13669	21.8481	3.16912	6.70033	1.05789	10.6979	2.97587	8.10233	1.1317	6.20272	0.850461	0.115151		0.328179		0.276585		0.136401		0.000942077	***	0.0181805	*	0.0056374	**	9.25111e-05	***
FFA(18:3)	0.503983	0.0476785	0.185729	0.0368782	0.527896	0.0294942	0.260425	0.0130483	0.42572	0.0408896	0.116267	0.00559099	0.468616	0.0205797	0.140776	0.00857384	2.68217e-05	***	2.83327e-08	***	0.680691		0.0693277		0.230462		0.104811		0.109463		1.19604e-07	***
FFA(18:2)	13.9881	0.968283	7.04688	1.48019	17.0682	1.46205	8.30009	0.383694	11.1164	1.11954	3.92155	0.251668	13.0113	0.830231	4.87413	0.408379	0.000725185	***	5.48505e-06	***	0.0887397		0.421255		0.0647707		0.0718308		0.0223461	*	3.73913e-06	***
FFA(18:1)	25.7425	4.33677	32.3082	5.62569	24.9727	2.93291	24.1348	0.852103	16.9618	1.95352	17.2503	0.951712	18.7251	1.35596	19.937	1.15355	0.365342		0.778457		0.886629		0.164932		0.0880017		0.0257067	*	0.0598665		0.00780507	**
FFA(18:0)	19.3967	5.91826	22.5648	5.63777	18.4341	4.01734	22.803	2.4864	1.92438	0.441198	3.0022	1.22924	3.18499	0.704674	4.94579	1.57381	0.702039		0.356795		0.896152		0.969507		0.0103866	*	0.00558684	**	0.00082135	***	4.15524e-06	***
FFA(20:4)	0.72971	0.049252	0.548738	0.040117	0.939612	0.042701	0.791431	0.0458728	0.622283	0.0584053	0.50322	0.0232099	0.58023	0.0617539	0.518679	0.0457968	0.00933526	**	0.0285017	*	0.0043721	**	0.000629435	***	0.171949		0.363095		0.000121386	***	0.000363191	***
FFA(20:3)	0.115102	0.0280359	0.110316	0.0198353	0.101943	0.00576619	0.130273	0.00864028	0.0826078	0.00762323	0.0907566	0.00409466	0.0887932	0.00629032	0.106962	0.0103103	0.890442		0.0141519	*	0.663857		0.366319		0.29463		0.38735		0.140484		0.0971033
FFA(20:2)	0.0853459	0.0256507	0.0618944	0.0154927	0.0566658	0.0136842	0.056949	0.0135444	0.0802518	0.00895569	0.0277445	0.0100357	0.0678954	0.0081759	0.103396	0.0131725	0.442208		0.988417		0.347716		0.812311		0.858257		0.0924886		0.480231		0.0222996	*
FFA(20:1)	0.452887	0.0381018	0.333249	0.0427255	0.383027	0.031626	0.366	0.0140528	0.427595	0.0410211	0.328265	0.0167603	0.331952	0.0220784	0.328483	0.0234118	0.0484059		0.617623		0.177184		0.474199		0.655635		0.920638		0.193671		0.183294
FFA(22:6)	0.0725279	0.0148685	0.0307566	0.00630107	0.0714908	0.0157779	0.0316625	0.00772088	0.0683655	0.00627918	0.0127701	0.00382026	0.0861969	0.011936	0.0460523	0.00803883	0.0168339	*	0.0299368	*	0.962271		0.928393		0.805327		0.0310013	*	0.460865		0.210099
FFA(22:5)	0.0249171	0.00526319	0.0160324	0.00284917	0.0288577	0.00281348	0.0217348	0.00325185	0.0250311	0.00187642	0.0125455	0.0014265	0.0236226	0.0015199	0.0190332	0.00240955	0.151862		0.115373		0.52721		0.200759		0.984476		0.316134		0.108527		0.511398
FFA(22:4)	0.0132232	0.0050926	0.0309973	0.00912442	0.0133702	0.00660513	0.0350695	0.0116355	0.00165046	0.00101998	0.0301205	0.00839923	0.00382801	0.00193483	0.0113867	0.00537501	0.103042		0.128556		0.985967		0.78558		0.0446132	*	0.94524		0.164647		0.0781266
FFA	87.8017	10.9753	105.552	17.2112	98.0064	12.7528	83.541	6.42864	42.1007	4.25491	38.7151	3.93347	46.9758	3.43669	39.7645	2.77545	0.393927		0.310457		0.548764		0.243654		0.00117686	**	0.00242244	**	0.000623623	***	2.71892e-06	***
AcCar(2:0)	0.579655	0.0550706	0.45116	0.050867	0.487561	0.0698779	0.209095	0.0216488	0.533064	0.0533068	0.352281	0.0391429	0.548225	0.0590001	0.320029	0.0456015	0.100587		0.000732152	***	0.308253		0.000239209	***	0.551147		0.151427		0.511961		0.0387984	*
AcCar	0.579655	0.0550706	0.45116	0.050867	0.487561	0.0698779	0.209095	0.0216488	0.533064	0.0533068	0.352281	0.0391429	0.548225	0.0590001	0.320029	0.0456015	0.100587		0.000732152	***	0.308253		0.000239209	***	0.551147		0.151427		0.511961		0.0387984	*
Carn(0:0)	3.06237	0.116417	1.66093	0.103287	3.28497	0.213564	2.06218	0.0702916	2.7955	0.204193	1.60742	0.0696075	3.06264	0.14829	1.68818	0.159776	7.84383e-09	***	1.35155e-05	***	0.359541		0.00402062	**	0.258939		0.685073		0.395558		0.0434637	*
Carn	3.06237	0.116417	1.66093	0.103287	3.28497	0.213564	2.06218	0.0702916	2.7955	0.204193	1.60742	0.0696075	3.06264	0.14829	1.68818	0.159776	7.84383e-09	***	1.35155e-05	***	0.359541		0.00402062	**	0.258939		0.685073		0.395558		0.0434637	*
LPC	1.84056	0.0981724	1.67545	0.16393	2.21761	0.135385	2.49091	0.107036	1.93154	0.215192	1.93928	0.0853673	1.66913	0.110678	1.80681	0.138365	0.396866		0.125147		0.0329764	*	0.000403056	***	0.696194		0.193961		0.00473273	**	0.000749779	***
PC	52.2153	0.733063	49.9707	1.26576	51.0937	0.783642	47.9503	0.728205	56.2376	1.21048	49.8054	0.639873	52.6092	0.459859	49.9042	1.80281	0.139161		0.00777835	**	0.307335		0.180376		0.00859472	**	0.913863		0.103375		0.325866
LPE	0.88894	0.0713835	0.682117	0.0514578	1.08096	0.0673243	0.940656	0.0467687	0.820942	0.0853682	0.71046	0.0465619	0.597607	0.0680407	0.676646	0.0718416	0.0281348	*	0.0972171		0.064914		0.00119658	**	0.545288		0.692574		5.48802e-05	***	0.00547788	**
PE	24.5001	0.718588	25.9367	0.921425	25.1409	0.722671	27.5263	0.644953	20.8223	0.967573	26.0665	0.613421	23.8524	0.553031	26.529	1.49989	0.231897		0.0221374	*	0.537008		0.171554		0.0055956	**	0.911766		0.167353		0.547575
PE-P	3.75625	0.150028	2.71162	0.129941	3.48655	0.246839	2.38827	0.0959824	3.85565	0.154959	3.03075	0.234601	3.68851	0.200848	2.71496	0.182187	2.79178e-05	***	0.000328827	***	0.35195		0.0578148		0.649816		0.227973		0.529544		0.12691
LPI	0.309093	0.0134444	0.344313	0.0141897	0.301303	0.0134396	0.332602	0.0130796	0.233859	0.0172059	0.323826	0.0154067	0.216286	0.00984545	0.274411	0.0266601	0.0853027		0.11022		0.686685		0.550149		0.00225054	**	0.340098		4.07091e-05	***	0.0628388
PI	4.65901	0.0877376	4.49209	0.117969	4.38643	0.104954	4.00265	0.0958605	4.767	0.127896	4.46519	0.081138	4.51498	0.112397	4.4814	0.209228	0.268416		0.0132396	*	0.0580336		0.00394316	**	0.487619		0.858772		0.414927		0.0493585
LPS	0.138502	0.00871673	0.0880695	0.00597078	0.158793	0.00714667	0.100479	0.00575023	0.113105	0.0148337	0.0916244	0.00352806	0.0958071	0.00774492	0.0764375	0.00629208	9.13547e-05	***	2.37355e-06	***	0.0894262		0.148602		0.146738		0.631941		6.72171e-06	***	0.00996029	**
PS	2.73538	0.188127	2.78145	0.0839055	2.69387	0.109597	2.50588	0.0602534	2.66167	0.152135	2.65834	0.085191	2.76463	0.143918	2.58569	0.114742	0.825122		0.138951		0.854117		0.0140598	*	0.766221		0.318928		0.703598		0.544304
LPG	0.0404924	0.00217728	0.119572	0.0155482	0.0410143	0.00230103	0.099007	0.00628662	0.0355863	0.00335659	0.103018	0.0135687	0.0474849	0.00336089	0.0845374	0.00867618	4.81753e-05	***	4.03544e-08	***	0.870641		0.233073		0.226077		0.441498		0.133696		0.190591
PG/BMP	0.873816	0.0390688	3.38567	0.41992	0.927823	0.0442496	3.20123	0.208316	0.656858	0.0314631	2.51366	0.3125	0.979572	0.0747039	2.3665	0.232051	5.40001e-06	***	1.28291e-09	***	0.368883		0.697758		0.000336404	***	0.123416		0.566597		0.0137762	*
LPA	0.0112081	0.00132036	0.0139974	0.00140488	0.00972695	0.00108236	0.0130091	0.00182793	0.0061984	0.000521927	0.00774577	0.000713988	0.0055818	0.000657412	0.00542632	0.000670553	0.162066		0.146114		0.400458		0.67232		0.00263379	**	0.00132075	**	0.00312387	**	0.000779775	***
PA	0.147833	0.0169574	0.173475	0.016629	0.0984214	0.00865106	0.12403	0.00866112	0.105744	0.0117961	0.128651	0.0114592	0.10277	0.00626666	0.110846	0.0100525	0.291985		0.0491926		0.0197276	*	0.0150511	*	0.0583599		0.0457935		0.684434		0.331222
CL	5.66924	0.172207	5.70053	0.220272	5.76054	0.14021	6.07672	0.147497	5.12359	0.237881	5.99475	0.140086	6.05617	0.131466	5.99746	0.291861	0.911891		0.136786		0.688417		0.169891		0.0738751		0.295147		0.138594		0.81072
LCL	0.229327	0.0171653	0.176857	0.0165611	0.375785	0.027198	0.296595	0.0125394	0.210688	0.0308638	0.192129	0.0103882	0.210227	0.0227667	0.20392	0.0211574	0.0386209	*	0.0128161	*	0.000142037	***	8.4701e-06	***	0.595001		0.465271		0.000123195	***	0.00105984	**
SM	1.93055	0.145619	1.70396	0.125645	2.18706	0.119646	1.91071	0.138325	2.31347	0.137898	1.91611	0.0882598	2.53168	0.122341	2.12498	0.110815	0.251345		0.148958		0.192493		0.28052		0.0711345		0.199198		0.0576887		0.239528
Cer	0.0544032	0.0125559	0.0433961	0.00414918	0.0394863	0.00769542	0.0406127	0.0104569	0.10421	0.0132555	0.0525038	0.00772103	0.0580397	0.00855513	0.0567455	0.0100618	0.414139		0.932724		0.333115		0.806885		0.0125668	*	0.289324		0.1242		0.278262
DG	16.1746	0.362556	14.1137	1.16946	15.6153	0.813065	13.9784	1.05396	15.4957	1.23911	13.4343	1.21871	14.0904	0.593521	10.3576	0.538921	0.106472		0.238475		0.524643		0.932294		0.590735		0.693157		0.140149		0.00575278	**
TG	1539.69	172.178	2007.93	187.199	1013.38	59.7853	1459.2	155.003	1593.18	177.565	2273.59	219.305	1122.15	83.2437	1259.77	138.566	0.0791444		0.0169996	*	0.0111134	*	0.034221	*	0.830976		0.364844		0.308308		0.347858
FFA	87.8017	10.9753	105.552	17.2112	98.0064	12.7528	83.541	6.42864	42.1007	4.25491	38.7151	3.93347	46.9758	3.43669	39.7645	2.77545	0.393927		0.310457		0.548764		0.243654		0.00117686	**	0.00242244	**	0.000623623	***	2.71892e-06	***
AcCar	0.579655	0.0550706	0.45116	0.050867	0.487561	0.0698779	0.209095	0.0216488	0.533064	0.0533068	0.352281	0.0391429	0.548225	0.0590001	0.320029	0.0456015	0.100587		0.000732152	***	0.308253		0.000239209	***	0.551147		0.151427		0.511961		0.0387984	*
Carn	3.06237	0.116417	1.66093	0.103287	3.28497	0.213564	2.06218	0.0702916	2.7955	0.204193	1.60742	0.0696075	3.06264	0.14829	1.68818	0.159776	7.84383e-09	***	1.35155e-05	***	0.359541		0.00402062	**	0.258939		0.685073		0.395558		0.0434637	*
Membrane lipids/TG (%)	7.37649	0.778417	5.39174	0.428317	10.3077	0.760284	8.03081	1.07999	7.4349	1.18478	4.67335	0.330792	9.37626	0.580917	9.07455	0.994006	0.0359764	*	0.104907		0.0138425	*	0.0332492	*	0.966989		0.213273		0.336622		0.484497
DBI	3.20772	0.0374358	3.23964	0.0329271	3.35122	0.0282296	3.32077	0.0212495	3.31947	0.0776431	3.13166	0.027494	3.41162	0.0275489	3.40964	0.0627142	0.528554		0.393416		0.00655836	**	0.0503823		0.197065		0.023398	*	0.141015		0.193234
Membrane lipids include all measured lipids except DG, TG, FFA, AcCar and Carn.
Student’s t-tests were performed for pairwise multiple comparisons; significance was accepted for P<0.045 corresponding to a false discovery rate q<0.05. ***P<0.001, **P<0.01, *P<0.045.
PC, diacyl phosphatidylcholine; PE, diacyl phosphatidylethanolamine; PE-P, alkenyl-acyl phosphatidylethanolamine; PI, phosphatidylinositol; PS, phosphatidylserine;
PG, phosphatidylglycerol; BMP, bis(monoacylglycero)phosphate; PA, phosphatidic acid; CL, cardiolipin; LPC, LPE, LPI, LPS, LPG, LCL, the corresponding lyso lipids;
SM, sphingomyelin; Cer, ceramide; DG, diacylglycerol; TG, triacylglycerol; FFA, free fatty acid; AcCar, acylcarnitine; Carn, carnitine.
Sum formulas for glycero(phospho)lipids are defined as the lipid class abbreviation followed by the total number of carbons and total number of double bonds for all chains, e.g. PC(34:1).
Sum formulas for sphingolipids are defined as the lipid class abbreviation followed by the total number of carbons, total number of double bonds and total number of hydroxyl groups in the long chain base and the fatty acyl moiety, e.g. SM(34:1:2).
*PG and BMP species could not be resolved by the applied shotgun strategy. For simplicity, PG/BMP are indicated as PG or LPG in the species list.
The double bond index (DBI) was calculated for membrane phospholipids (PC, PE, PE-P, PS, PI, PG, PA) as Σ(mol% of unsaturated fatty acids in the given lipid class x number of double bonds of each unsaturated fatty acid)/100.

## Sheet: S4_Lipid_Resolved structures
Table S4. Tandem MSn fragmentation parameters and result list for BAT lipid species
Fragmentation parameters
Lipid Class	Ion format	MSn	Activation type and normalized energy	Class-specific fragment	Species-specific fragment
PC	[M+Cl]−	MS3	CID30 & HCD25	NL 50 (in MS2)	fatty acyl carboxylate anion / loss of neutral fatty acid / loss of neutral ketene
PE	[M−H]−	MS2	HCD25	PIS 196
PI	[M−H]−	MS2	HCD30	PIS 241
PS	[M−H]−	MS3	CID30 & HCD25	NL 87 (in MS2)
PG/BMP	[M−H]−	MS2	HCD25	PIS 153
CL	[M−2H]2−	MS2	HCD25	PIS 153
DG	[M+NH4]+	MS2	HCD18	NL 17 / NL 35	NL [M-17-FA]
TG	[M+NH4]+	MS2	HCD18	NL 17 / NL 35	NL [M-17-FA]
Lipid species
Sum formula	Resolved structure*
PC(32:1)	16:0/16:1
PC(32:0)	16:0/16:0
PC(34:3)	16:1/18:2
PC(34:2)	16:0/18:2
PC(34:1)	16:0/18:1
PC(36:4)	di18:2, 16:0/20:4
PC(36:3)	18:1/18:2 (16:0/20:3)
PC(36:2)	18:0/18:2
PC(36:1)	18:0/18:1
PC(38:6)	18:2/20:4, 16:0/22:6
PC(38:5)	18:1/20:4, 16:0/22:5
PC(38:4)	18:0/20:4
PC(38:3)	18:0/20:3
PC(40:6)	18:0/22:6
PE(34:2)	16:0/18:2, 16:1/18:1
PE(34:1)	16:0/18:1
PE(36:4)	16:0/20:4, di18:2
PE(36:2)	18:0/18:2
PE(36:1)	18:0/18:1
PE(38:7)	16:1/22:6
PE(38:6)	16:0/22:6, 18:2/20:4
PE(38:5)	18:1/20:4
PE(38:4)	18:0/20:4
PE(40:7)	18:1/22:6
PE(40:6)	18:0/22:6
PE-P(34:1)	P-16:0/18:2
PE-P(34:1)	P-16:0/18:1
PE-P(36:4)	P-16:0/20:4
PE-P(36:2)	P-18:1/18:2
PE-P(36:2)	P-18:0/18:2, P-18:1/18:1
PE-P(36:1)	P-18:0/18:1
PE-P(38:6)	P-16:0/22:6
PE-P(38:5)	P-18:1/20:4, P-16:0/22:5
PE-P(38:4)	P-18:0/20:4
PE-P(40:6)	P-18:0/22:6
PE-P(40:5)	P-18:0/22:5
PE-P(40:4)	P-18:0/22:4, P-20:0/20:4
PI(36:4)	16:0/20:4
PI(36:2)	18:1/18:2
PI(36:2)	18:0/18:2, di18:1
PI(38:5)	18:1/20:4
PI(38:4)	18:0/20:4
PS(34:2)	16:0/18:2
PS(36:4)	di18:2, 16:0/20:4
PS(36:3)	18:1/18:2
PS(36:2)	18:0/18:2
PS(36:1)	18:0/18:1
PS(38:6)	16:0/22:6
PS(38:5)	18:1/20:4
PS(38:4)	18:0/20:4
PS(38:3)	18:0/20:3
PS(38:1)	18:1/20:0, 18:0/20:1
PS(40:7)	18:1/22:6
PS(40:6)	18:0/22:6
PS(40:5)	18:0/22:5
PS(40:4)	18:0/22:4
PS(40:3)	18:0/22:3
PS(40:2)	18:1/22:1
PS(40:1)	18:1/22:0
PS(42:4)	22:0/20:4, 22:1/20:3
PS(42:2)	18:1/24:1
PS(42:1)	18:1/24:0
PG(34:3)	16:1/18:2
PG(34:2)	16:1/18:1, 16:0/18:2
PG(34:1)	16:0/18:1
PG(36:4)	di18:2, 16:0/20:4
PG(36:3)	18:1/18:2
PG(36:2)	di18:1, 18:0/18:2
PG(36:1)	18:0/18:1
PG(38:6)	18:2/20:4, 16:1/22:5
PG(38:5)	18:1/20:4
PG(38:4)	18:1/20:3, 18:0/20:4
PG(38:3)	18:1/20:2
PG(38:2)	18:1/20:1
PG(40:8)	18:2/22:6, di20:4
PG(40:7)	18:1/22:6
PG(40:6)	18:1/22:5
PG(40:5)	18:1/22:4
CL(70:7)	16:1_18:2_18:2_18:2
CL(70:6)	16:1_18:1_18:2_18:2, 16:0_18:1_18:2_18:2
CL(70:5)	16:1_18:1_18:1_18:2, 16:0_18:1_18:2_18:2
CL(70:4)	16:0_18:1_18:1_18:2, 16:1_18:1_18:1_18:1
CL(72:8)	tetra18:2
CL(72:7)	18:1_18:2_18:2_18:2
CL(72:6)	18:1_18:1_18:2_18:2
CL(72:5)	18:1_18:1_18:1_18:2
DG(34:1)	16:0/18:1
DG(36:4)	di18:2
DG(36:3)	18:1/18:2
DG(36:2)	di18:1
TG(50:3)	14:0_18:1_18:2, 16:0_16:1_18:2, 16:1_16:1_18:1
TG(52:4)	16:0_18:2_18:2, 16:1_18:1_18:2
TG(52:3)	16:0_18:1_18:2, 16:1_18:1_18:1
TG(52:2)	16:0_18:1_18:1
TG(54:6)	tri18:2
TG(54:5)	18:1_18:2_18:2
TG(54:4)	18:1_18:1_18:2
TG(54:3)	tri18:1
TG(54:2)	18:0_18:1_18:1
TG(56:6)	18:1_18:1_20:4
TG(56:5)	18:1_18:1_20:3, 18:1_18:2_18:2, 18:1_18:0_18:1_20:4
TG(56:4)	18:1_18:2_20:1, 18:1_18:1_20:2
TG(56:3)	18:1_18:1_20:1
TG(56:2)	18:1_18:1_20:0, 18:0_18:1_20:1
*Major species are listed.
PC, diacyl phosphatidylcholine; PE, diacyl phosphatidylethanolamine; PE-P, alkenyl-acyl phosphatidylethanolamine; PI, phosphatidylinositol; PS, phosphatidylserine;
PG, phosphatidylglycerol; BMP, bis(monoacylglycero)phosphate; CL, cardiolipin; DG, diacylglycerol; TG, triacylglycerol.
In resolved structures, the Lipid class(sn-1_sn-2) format specifies the structures of the fatty acyl side chains, e.g. TG(18:1_18:2_18:2), whereas the Lipid class(sn-1/sn-2) format specifies the side chain regiochemistry, too, e.g. PC(16:0/18:1).

## Sheet: S5_P values_trained_ATs
Table S5. P values for gene expression analysis in ATs, Trained vs. sedentary
	Trained vs. Sedentary
	BAT				WAT SC				WAT VIS
	Male WT/ND	Male APOB/HFD	Female WT/ND	Female APOB/HFD	Male WT/ND	Male APOB/HFD	Female WT/ND	Female APOB/HFD	Male WT/ND	Male APOB/HFD	Female WT/ND	Female APOB/HFD
Lep	0.416893	0.692163	0.324545	0.949825	0.029299	0.69223	0.844699	0.719892	0.049362	0.826692	0.628888	0.865071
Adipoq	0.0883941	0.966055	0.0744147	0.811922	0.897643	0.848556	0.978203	0.434607	0.448719	0.251845	0.541631	0.336943
Retn	0.353673	0.235713	0.129493	0.288994	0.270096	0.729923	0.803409	0.229677	0.818687	0.492631	0.498941	0.523502
Fgf21	0.345985	0.0904484	0.132746	0.21635	0.0600515	0.973733	0.707532	0.764917	0.456628	0.644204	0.372251	0.851125
Nampt	0.0557581	0.179302	0.148675	0.494231	0.0524291	0.0930284	0.367572	0.517205	0.368068	0.277164	0.111309	0.476774
Rarres2	0.768192	0.0363465	0.0837133	0.337362	0.773857	0.833567	0.487066	0.639178	0.0884482	0.86421	0.42325	1
Tnf	0.198782	0.52361	0.555999	0.33545	0.0969072	0.0223771	0.775651	0.512097	0.0441163	0.175789	0.017482	0.644523
Il1b	0.714743	0.411751	0.289582	0.31224	0.274235	0.0324831	0.672951	0.712799	0.125695	0.963751	0.0629329	0.590579
Tgfb1	0.371771	0.637323	0.448314	0.514113	0.0173082	0.0331732	0.840769	0.840395	0.0137424	0.0658489	0.175591	0.908641
Il10	0.965398	0.0966801	0.255987	0.123294	0.932466	0.17418	0.321312	0.970218	0.050667	0.0496528	0.75589	0.350821
Lepr	0.230591	0.170041	0.151872	0.89954	0.412816	0.197367	0.860309	0.911884	0.925676	0.874161	0.261812	0.78865
Cd36	0.202551	0.794589	0.0362183	0.213541	0.0893483	0.603801	0.638552	0.456254	0.1358	0.789068	0.467803	0.808491
Insr	0.613226	0.934694	0.266658	0.0308692	0.992693	0.833679	0.610951	0.0734799	0.924351	0.2998	0.970076	0.194374
Irs1	0.419384	0.785019	0.508967	0.790499	0.765947	0.254311	0.637082	0.313607	0.646437	0.468834	0.893234	0.948235
Slc2a4	0.909414	0.540448	0.224073	0.363443	0.323947	0.184474	0.588002	0.468844	0.0241944	0.0496771	0.562898	0.859832
Ucp1	0.00991799	0.149241	0.907662	0.226305	0.146068	0.310984	0.611043	0.495926	0.126022	0.662523	0.900031	0.0732838
Cox8b	0.314357	0.423758	0.0403037	0.202402	0.0962616	0.874535	0.741956	0.277993	0.102136	0.408767	0.309681	0.964516
Cidea	0.0208694	0.394017	0.216348	0.0906174	0.0102051	0.475618	0.560778	0.777361	0.98852	0.0973094	0.96612	0.0638772
Hsf1	0.439651	0.553784	0.045014	0.0586835	0.196405	0.316643	0.636112	0.100922	0.790627	0.336788	0.743047	0.101063
Grp94	0.914632	0.318563	0.0823084	0.0320642	0.136315	0.0490117	0.302876	0.857515	0.746806	0.65963	0.303358	0.561423
Bip	0.96253	0.191582	0.014867	0.0302633	0.594659	0.00263846	0.23637	0.447578	0.828352	0.591495	0.250676	0.633839
Chop	0.555301	0.599587	0.375017	0.0572065	0.0359348	0.0793328	0.853624	0.797384	0.27308	0.807957	0.589567	0.537254

## Sheet: S6_P values_trained_liver
Table S6. P values for gene expression analysis in liver, Trained vs. sedentary
	Trained vs. Sedentary
	Liver
	WT/ND male	APOB/HFD male	WT/ND female	APOB/HFD fem.
ApoA5	0.72514	0.95793	0.676285	0.00805993
ApoC2	0.654591	0.00517631	0.2473	0.986467
Fgf21	0.0919775	0.121046	0.676684	0.753487
Ahsg	0.888271	0.27127	0.410502	0.977686
Tnf	0.0803557	0.0800673	0.317975	0.651002
Il1b	0.115951	0.276452	0.546928	0.162665
Tgfb1	0.997372	0.00499166	0.50846	0.0347354
Il10	0.469129	0.0670512	0.658193	0.300182
Lepr	0.77112	0.661976	0.392274	0.600319
Cd36	0.130425	0.00204139	0.225225	0.0613778
Insr	0.457238	0.754236	0.39498	0.988826
Irs1	0.933482	0.255522	0.00375125	0.727985
AdipoR1	0.472434	0.436802	0.0681358	0.772101
AdipoR2/1	0.977622	0.158175	0.10162	0.532675
AdipoR2/2	0.891244	0.150623	0.0394473	0.332155
Hsf1	0.153545	0.257371	0.268107	0.967164
Grp94	0.792786	0.567922	0.247655	0.481246
Bip	0.266357	0.0637365	0.507605	0.905818
Chop	0.217452	0.150521	0.0145058	0.553463

## Sheet: S7_Diet
Table S7. Diet composition
		FRESH	10% H2O
PROXIMATES												Normal Diet	High-fat Diet
CRUDE OIL	%	22.27	21.65				FRESH	10% H2O			Moisture (%)	10	10
CRUDE PROTEIN	%	19.87	19.31		MINERALS						Crude Oil (%)	4.75	21.65
CRUDE FIBRE	%	3.76	3.65		CONT-D						Crude Protein (%)	19.11	19.31
ASH	%	5.11	4.97		CL	%	0.38	0.39			Crude Fibre (%)	3.85	3.65
NFE	%	41.09	39.94		S CL	%	0.31	0.3			Ash (%)	6.97	4.97
					K	%	0.64	0.62			NFE (%)	55.32	39.34
ENERGY					S K	%	0.5	0.49			High-fat Diet contains 0.15% of supplementary cholesterol (giving a total of 2% cholesterol).
AF ENERGY	MJ/kg	18.57	19.1		MG	%	0.17	0.17
AF ENERGY	kcal/g	4.44	4.32		S MG	%	0.1	0.1
					FE	mg/kg	116.4	113.14
FATTY ACIDS					S FE	mg/kg	96.17	93.48
C14 1	%	0.03	0.03		CU	mg/kg	15.32	14.89
MYRISTOLEIC					S CU	mg/kg	10	9.72
C16 1 PALMITOLEIC	%	0.11	0.11		MN	mg/kg	61.83	60.1
C18 1 W9 OLEIC	%	6.66	6.47		S MN	mg/kg	49.91	48.51
C18 2 W6	%	2	1.94		ZN	mg/kg	53.72	52.22
LINOLEIC					S ZN	mg/kg	18	17.5
C18 3 W3 LINOLENIC	%	0.11	0.11		CO	μg/kg	537.57	522.53
C20 4 W6	%	0.03	0.03		S CO	μg/kg	525	510.31
ARICHIDONIC					I	μg/kg	12.74	12.38
C22 5 W3 CLUPANODONIC	%	0	0		S I	μg/kg	0	0
C12:0 LAURIC	%	0.03	0.03		SE	μg/kg	45.28	44.01
C14:0 MYRISTIC	%	0.36	0.35		S SE	μg/kg	0	0
C16:0 PALMITIC	%	4.56	4.43		F	mg/kg	4.67	4.54
C18:0 STEARIC	%	2.04	1.98
					VITAMINS
AMINO ACIDS					VIT A	iu/kg	6575.31	6391.38
ARGININE	%	0.71	0.69		S VIT A	iu/kg	5000	4860.14
LYSINE	%	1.16	1.13		VIT D3	iu/kg	2384.2	2317.51
S LYS	%	0	0		S VIT D3	iu/kg	1000	972.03
METHIONINE	%	0.48	0.47		VIT E	iu/kg	61.47	59.75
S METH	%	0	0		S VIT E	iu/kg	50	48.6
CYSTINE	%	0.1	0.1		VIT B1 THI	mg/kg	5.67	5.51
S CYST	%	0	0		S VIT B1	mg/kg	4.05	3.94
TRYPTOPHAN	%	0.18	0.17		VIT B2 RIB	mg/kg	4.64	4.51
S TRYPT	%	0	0		S VIT B2	mg/kg	4	3.89
HISTIDINE	%	0.48	0.47		VIT B6 PYR	mg/kg	4.99	4.85
THREONINE	%	0.7	0.68		S VIT B6	mg/kg	4.08	3.97
S THREO	%	0	0		VIT B12 CY	μg/kg	5.45	5.3
ISOLEUCINE	%	0.97	0.94		S VIT B12	μg/kg	5	4.86
LEUCINE	%	1.6	1.56		VIT C ASCO	mg/kg	8.57	8.33
PHENYLALAN	%	0.85	0.83		S VIT C	mg/kg	7	6.8
VALINE	%	1.17	1.14		VIT K MENE	mg/kg	5.26	5.11
TYROSINE	%	0.82	0.8		S VIT K	mg/kg	5.15	5.01
TAURINE	%	0	0		FOLIC ACID	mg/kg	0.15	0.15
GLYCINE	%	0.85	0.83		S FOLIC	mg/kg	0	0
ASPARTIC A	%	1.11	1.08		NICOTINIC	mg/kg	21.44	20.84
GLUTAMIC A	%	3.3	3.21		S NICOTIN	mg/kg	9.8	9.53
PROLINE	%	1.39	1.35		PANTOTHENI	mg/kg	13.3	12.93
SERINE	%	0.8	0.78		S PANTOTH	mg/kg	9.87	9.59
HYD PROLIN	%	0.01	0.01		CHOLINE	mg/kg	262.22	254.88
HYD LYSINE	%	0	0		S CHOLINE	mg/kg	99.4	96.62
ALANINE	%	0.59	0.57		INOSITOL	mg/kg	908.5	883.09
					S INOSITOL	mg/kg	98	95.26
MINERALS					BIOTIN	μg/kg	56.35	54.77
CA	%	0.66	0.64		S BIOTIN	μg/kg	0	0
S CA	%	0.64	0.62
TOTAL P	%	0.57	0.55
S PHOS	%	0.4	0.39
PHYTATE P	%	0.05	0.05
AVAIL P	%	0.52	0.51
NA	%	0.23	0.22
S NA	%	0.2	0.19

## Sheet: S8_Primers
Table S8. primer sequences used in this study
	gene	forward primer	reverse primer
1	Gapdh	GGG TTC CTA TAA ATA CGG ACT GC	CCA TTT TGT CTA CGG GAC GA
2	Lep	GTGGCTTTGGTCCTATCTGTC	CGTGTGTGAAATGTCATTGATCC
3	Adipoq	GTTCCCAATGTACCCATTCGC	TGTTGCAGTAGAACTTGCCAG
4	Retn	ACAAGACTTCAACTCCCTGTTTC	TTTCTTCACGAATGTCCCACG
5	Fgf21	GTGTCAAAGCCTCTAGGTTTCTT	GGTACACATTGTAACCGTCCTC
6	Nampt	GCAGAAGCCGAGTTCAACATC	TTTTCACGGCATTCAAAGTAGGA
7	Rarres2	GCCTGGCCTGCATTAAAATGG	CTTGCTTCAGAATTGGGCAGT
8	Tnf	CCCTCACACTCAGATCATCTTCT	GCTACGACGTGGGCTACAG
9	Il1b	GCAACTGTTCCTGAACTCAACT	ATCTTTTGGGGTCCGTCAACT
10	Tgfb1	CTCCCGTGGCTTCTAGTGC	GCCTTAGTTTGGACAGGATCTG
11	Il10	CAGAGCCACATGCTCCTAGA	TGTCCAGCTGGTCCTTTGTT
12	Lepr	AGCTAGGTGTAAACTGGGACA	GCAGAGGCGAATCATCTATGAC
13	Cd36	TTGAAAAGTCTCGGACATTGAG	TCAGATCCGAACACAGCGTA
14	Insr	TCAAGACCAGACCCGAAGATT	TCTCGAAGATAACCAGGGCATAG
15	Irs1	CGATGGCTTCTCAGACGTG	CAGCCCGCTTGTTGATGTTG
16	Slc2a4	ACACTGGTCCTAGCTGTATTCT	CCAGCCACGTTGCATTGTA
17	Ucp1	AGGCTTCCAGTACCATTAGGT	CTGAGTGAGGCAAAGCTGATTT
18	Cox8b	TGTGGGGATCTCAGCCATAGT	AGTGGGCTAAGACCCATCCTG
19	Cidea	TGACATTCATGGGATTGCAGAC	GGCCAGTTGTGATGACTAAGAC
20	Hsf1	GGGAAACAGGAGTGTATGGACT	CTTGTTGACAACTTTTTGCTGCT
21	Grp94	AAGAATGAAGGAAAAACAGGACAAAA	CAAATGGAGAAGATTCCGCC
22	Bip	TTCAGCCAATTATCAGCAAACTCT	TTTTCTGATGTATCCTCTTCACCAGT
22	Chop	CCACCACACCTGAAAGCAGAA	AGGTGAAAGGCAGGGACTCA
22	ApoA5	GTGCTGCTGTCCCAACCTA	CTGAGTGTAATGCCCCTGAGT
22	ApoC2	CCAACCCACTGGAGTACTGG	CCATGCTGTCTGGGACCT
22	Ahsg	GTCACAGATCCAGCCAAATG	TGAGATTTGCCTTGCAGAAG
22	AdipoR1	TGGTCTTCGGGATGTTCTTC	CCCTGAATAGTCCAGTTTGGAA
22	AdipoR2/1	CACAAACTCTTAGGGAACCGAAT	CACCGAAGGGAAGTTACTGG
22	AdipoR2/2	GTCAGAGCAGGAGTGTTCGTG	CAGCCTATCTGCCCTATGGTG
